# Supplementary material for: GENERALIZED GAUGE INVARIANCE AND CORRELATED BOSON FIELDS
Source: Royal Society of Chemistry journal article supplement (doi:10.1039/d3ob02101g), 1962-01-01
Supplement: d3ob02101g1.pdf [file d3ob02101g1.pdf]

# Total Synthesis and Cytotoxicity Evaluation of Spirostanol Saponin Gitonin

Yong Li<sup>a, b</sup>, Xun Lv<sup>c</sup>, Jun Liu<sup>a, b, d\*</sup>, Yuguo Du<sup>a, b, d\*</sup>

<sup>a</sup> State Key Laboratory of Environmental Chemistry and Eco-toxicology, Research Center for Eco-Environmental Sciences, Chinese Academy of Sciences, Beijing 100085, China;

<sup>b</sup> School of Chemistry and Chemical Engineering, University of Chinese Academy of Sciences, Beijing 100049, China;

<sup>c</sup> CAS Key Laboratory of Pathogenic Microbiology and Immunology, Institute of Microbiology, Chinese Academy of Sciences, Beijing 100101, China.

<sup>d</sup> Binzhou Institute of Technology, Weiqiao-UCAS Science and Technology Park, Binzhou 256606, Shandong Province, China

# Contents

|                                                                                                      |     |
|------------------------------------------------------------------------------------------------------|-----|
| 1. Synthesis of gitonin analogs for bioassay ( <b>Scheme S1-4</b> ).....                             | S3  |
| 2. Bioassay experiment of gitonin and its derivatives .....                                          | S8  |
| 3. Copies of NMR Spectra .....                                                                       | S9  |
| 4. Comparison of selected $^1\text{H}$ NMR and $^{13}\text{C}$ NMR data of gitonin ( <b>1</b> )..... | S54 |

# 1. Synthesis of gitonin analogs for bioassay (Scheme S1-4)

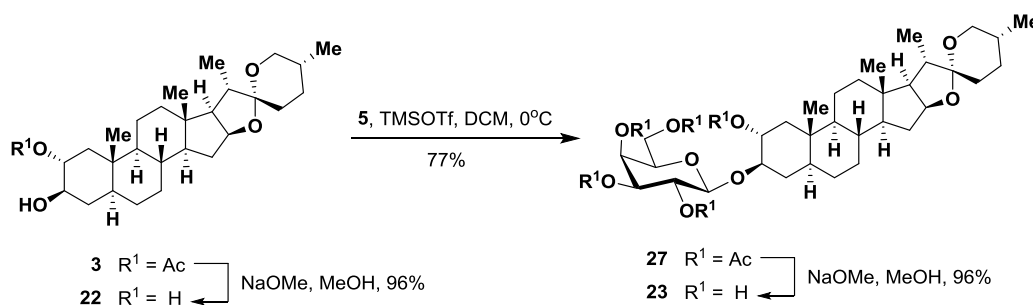

**Scheme S1.** Synthesis of 2 $\alpha$ -OH tigogenin derivative **22** and galactosylation derivative **23**

## Synthesis of compound **22**

To a solution of **3** (180 mg, 0.138 mmol) in MeOH (20 mL) was added 1 M NaOMe until pH of the solution reaches 9-10. After stirring at room temperature for 30 min, the reaction mixture neutralized with Dowex-50 (H<sup>+</sup>) ion exchange resin. The mixture was filtered and the filtrate was concentrated. The residue was purified by silica gel chromatography (petroleum ether/EtOAc 3:1) to afford **22** as an amorphous solid (157 mg, 96%):  $[\alpha]_D^{25} = -80$  (*c* 1.2, CHCl<sub>3</sub>); <sup>1</sup>H NMR (400 MHz, Pyridine-*d*<sub>5</sub>):  $\delta$  5.61-5.11 (*br s*, 2H, OH), 4.51 (*m*, 1H, H-16), 4.04-3.97 (*m*, 1H, H-2), 3.85-3.78 (*m*, 1H, H-3), 3.56-3.44 (*m*, 2H, H-26), 2.26-2.19 (*m*, 1H), 2.06-1.95 (*m*, 1H), 1.95-1.84 (*m*, 1H), 1.83-1.72 (*m*, 2H), 1.70-0.60 (*m*, 20H), 0.96 (*d*, *J* = 7.2 Hz, 3H, Me-21), 0.82 (*s*, 3H, Me-19), 0.79 (*s*, 3H, Me-18), 0.65 (*d*, *J* = 5.6 Hz, 3H, Me-27); <sup>13</sup>C NMR (100 MHz, Pyridine-*d*<sub>5</sub>):  $\delta$  109.4, 81.3, 76.9, 73.3, 67.1, 63.2, 56.6, 54.8, 46.7, 45.4, 42.2, 41.0, 40.4, 37.8, 37.4, 34.9, 32.6, 32.3, 32.0, 30.8, 29.5, 28.5, 21.7, 17.5, 16.8, 15.2, 13.9; HRMS(ESI): *calcd.* for C<sub>27</sub>H<sub>44</sub>O<sub>4</sub>Na<sup>+</sup>[M+Na]<sup>+</sup>, 455.3131; *found* 455.3131.

## Synthesis of compound **27**

The titled compound was prepared from compounds **3** (95 mg, 0.2 mmol) and **5** (118 mg, 0.24 mmol) by following a similar procedure to that for compound **17** to give **27** as a yellowish syrup (123 mg, 77%):  $[\alpha]_D^{25} = -30$  (*c* 1.6, CHCl<sub>3</sub>); <sup>1</sup>H NMR (400 MHz, CDCl<sub>3</sub>):  $\delta$  5.37 (*d*, *J* = 2.8 Hz, 1H, H-4<sup>1</sup>), 5.14 (*dd*, *J* = 10.4, 8.0 Hz, 1H, H-2<sup>1</sup>), 5.00 (*dd*, *J* = 10.8, 3.2 Hz, 1H, H-3<sup>1</sup>), 4.96 (*m*, 1H, H-2), 4.53 (*d*, *J* = 8.0 Hz, 1H, H-1<sup>1</sup>), 4.42-4.34 (*m*, 1H, H-16), 4.21-4.01 (*m*, 2H, H-6a<sup>1</sup> and H-6b<sup>1</sup>), 3.88 (*t*, *J* = 6.8 Hz, 1H, H-5<sup>1</sup>), 3.63-3.58 (*m*, 1H, H-3), 3.49-3.47 (*m*, 2H, H-26), 2.17-1.99 (*m*, 15H, 5  $\times$  Ac), 1.91-1.84 (*m*, 1H), 1.78-0.67 (*m*, 24H), 0.97 (*d*, *J* = 6.8 Hz, 3H, Me-21), 0.90 (*s*, 3H, Me-19), 0.78 (*d*, *J* = 6.5 Hz, 3H, Me-27), 0.76 (*s*, 3H, Me-18); <sup>13</sup>C NMR (100 MHz, CDCl<sub>3</sub>):  $\delta$  170.4, 170.32, 170.27, 170.2, 169.1, 109.3, 100.4, 81.3, 80.8, 77.2, 72.8, 71.0, 70.5, 69.3, 66.92, 66.86, 62.2, 61.2, 56.1, 54.2, 44.3, 42.4, 41.6, 40.5, 39.8, 37.1, 34.3, 33.5, 32.0, 31.7, 31.4, 30.3, 28.8, 27.9, 21.3, 20.8, 20.70, 20.67, 20.6, 17.1, 16.5, 14.5, 13.0; HRMS(ESI): *calcd.* for C<sub>43</sub>H<sub>64</sub>O<sub>14</sub>Na<sup>+</sup>[M+Na]<sup>+</sup>, 827.4188; *found* 827.4186.

## Synthesis of compound **23**

The titled compound was prepared from compound **27** (117 mg, 0.15 mmol) by following a similar procedure to that for compound **1** to give **23** as a white foamy solid (83 mg, 96%):  $[\alpha]_D^{25}$

= -28 (*c* 1.0, CH<sub>3</sub>OH); <sup>1</sup>H NMR (400 MHz, Pyridine-d<sub>5</sub>): δ 6.31-5.23 (*br s*, 5H, OH), 4.95 (d, *J* = 8.0 Hz, 1H, H-1<sup>I</sup>), 4.53-4.41 (m, 5H), 4.19-4.08 (m, 2H), 3.97-3.91 (m, 1H, H-2), 3.87-3.81 (m, 1H, H-3), 3.56-3.43 (m, 2H, H-26), 2.25-0.48 (m, 25H), 1.08 (d, *J* = 6.8 Hz, 3H, Me-21), 0.77 (*s*, 3H, Me-19), 0.69 (*s*, 3H, Me-18), 0.65 (d, *J* = 4.8 Hz, 3H, Me-27); <sup>13</sup>C NMR (100 MHz, Pyridine-d<sub>5</sub>): δ 109.0, 103.9, 84.9, 80.9, 77.0, 75.1, 72.1, 70.4, 70.0, 66.6, 62.8, 62.1, 56.1, 54.2, 45.5, 44.4, 41.7, 40.5, 39.8, 36.6, 34.4, 34.0, 32.0, 31.9, 31.6, 30.4, 29.0, 27.9, 21.2, 17.1, 16.4, 14.8, 13.2; HRMS(ESI): calcd. for C<sub>33</sub>H<sub>54</sub>O<sub>9</sub>Na<sup>+</sup>[M+Na]<sup>+</sup>, 617.3660; found 617.3660.

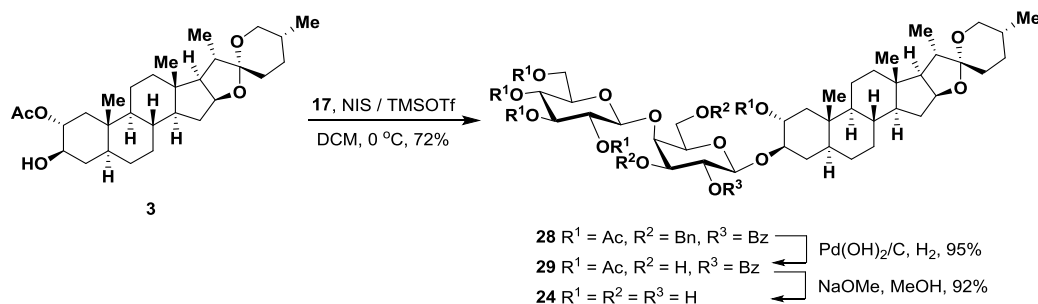

**Scheme S2.** Synthesis of disaccharide derivative **24**

### Synthesis of compound **28**

The titled compound was prepared from compounds **3** (44 mg, 0.09 mmol) and **17** (95 mg, 0.11 mmol) by following a similar procedure to that for compound **21** to give **28** as a yellowish syrup (84 mg, 72%): [ $\alpha$ ]<sub>D</sub><sup>25</sup> = -52 (*c* 1.4, CHCl<sub>3</sub>); <sup>1</sup>H NMR (400 MHz, CDCl<sub>3</sub>): δ 8.03-7.21 (m, 15H, Ph), 5.35 (dd, *J* = 10.0, 8.0 Hz, 1H, H-2<sup>I</sup>), 5.23 (t, *J* = 9.6 Hz, 1H, H-3<sup>II</sup>), 5.17 (d, *J* = 8.0 Hz, 1H, H-1<sup>II</sup>), 5.12 (t, 1H, *J* = 9.2 Hz, H-4<sup>II</sup>), 5.01 (dd, *J* = 9.6, 8.0 Hz, 1H, H-2<sup>II</sup>), 4.92-4.83 (m, 1H, H-2), 4.65-4.54 (m, 4H, 2 PhCH<sub>2</sub>), 4.52 (d, *J* = 8.0 Hz, 1H, H-1<sup>I</sup>), 4.39-4.33 (m, 1H, H-16), 4.31 (d, 1H, *J* = 2.0 Hz, H-4<sup>I</sup>), 4.23-4.19 (dd, *J* = 12.4, 4.4 Hz, 1H, H-6<sup>Ia</sup>), 4.06-4.10 (dd, *J* = 12.0, 2.0 Hz, 1H, H-6<sup>Ib</sup>), 3.79-3.75 (m, 1H, H-3<sup>I</sup>), 3.67-3.53 (m, 5H), 3.35-3.47 (m, 2H, H-26), 1.96-2.23 (m, 15H, 5 × Ac), 1.87-0.85 (m, 24H), 0.97 (d, *J* = 7.2 Hz, 3H, Me-21), 0.80 (d, *J* = 6.4 Hz, 3H, Me-27), 0.77 (*s*, 3H, Me-19), 0.73 (*s*, 3H, Me-18), 0.63-0.55 (m, 1H); <sup>13</sup>C NMR (100 MHz, CDCl<sub>3</sub>): δ 170.54, 170.50, 170.23, 170.16, 169.5, 164.9, 137.4, 133.0, 130.3, 129.7, 128.5, 128.4 (d), 128.3, 127.9 (t), 127.8 (d), 127.7, 127.6 (t), 109.3, 100.1, 99.7, 80.8, 80.3, 79.9, 77.2, 73.6, 73.6, 72.7, 72.5, 72.0, 71.72, 71.67, 71.4, 70.3, 69.1, 68.6, 66.7, 62.1, 61.9, 56.1, 54.1, 44.2, 42.4, 41.6, 40.5, 39.9, 37.0, 34.3, 33.4, 32.0, 31.7, 31.4, 30.3, 28.8, 27.6, 21.1 (d), 20.7 (d), 20.6 (d), 17.1, 16.4, 14.5, 12.9; HRMS(ESI): calcd. for C<sub>70</sub>H<sub>90</sub>O<sub>20</sub>Na<sup>+</sup>[M+Na]<sup>+</sup>, 1273.5917; found 1273.5915.

### Synthesis of compound **29**

The titled compound was prepared from **28** (84 mg, 0.067 mol) by following a similar procedure to that for compound **20** to give **29** as a white foamy solid (68 mg, 95%): [ $\alpha$ ]<sub>D</sub><sup>25</sup> = +39 (*c* 1.1, CHCl<sub>3</sub>); <sup>1</sup>H NMR (400 MHz, CDCl<sub>3</sub>): δ 8.02-8.01 (m, 2H, Ph), 7.61-7.56 (m, 1H, Ph), 7.48-7.42 (m, 2H, Ph), 5.22 (d, *J* = 9.2 Hz, 1H, H-2<sup>I</sup>), 5.19-5.00 (m, 3H), 4.91-4.84 (m, 2H), 4.62 (d, *J* = 7.6 Hz, 1H, H-1<sup>I</sup>), 4.37-4.23 (m, 2H), 4.15 (d, *J* = 2.0 Hz, 1H, H-4<sup>I</sup>), 4.03 (m, 1H), 4.84-4.73 (m, 3H), 3.68-3.56 (m, 3H), 3.46-3.32 (m, 2H, H-26), 3.03 (*br s*, 2H, OH), 2.24-1.98 (m, 15H, 5 × Ac),

1.88-0.81 (m, 24H), 0.94 (d,  $J = 7.6$  Hz, 3H, Me-21), 0.79 (s, 3H, Me-19), 0.77 (d,  $J = 6.4$  Hz, 3H, Me-27), 0.72 (s, 3H, Me-18), 0.68-0.59 (m, 1H);  $^{13}\text{C}$  NMR (100 MHz,  $\text{CDCl}_3$ ):  $\delta$  170.5, 170.4, 170.2, 169.5, 169.4, 167.4, 133.5, 129.8 (d), 129.5, 128.4 (d), 109.3, 101.7, 99.9, 80.8, 80.7, 77.2, 75.5, 74.7, 73.9, 73.4, 73.1, 72.9, 72.1, 71.4, 68.5, 66.9, 65.6, 62.2, 59.6, 56.1, 54.2, 44.3, 42.4, 41.6, 40.5, 39.9, 37.1, 34.3, 33.8, 32.0, 31.7, 31.4, 30.3, 28.8, 27.7, 21.3, 21.2, 20.6 (d), 20.5, 17.1, 16.4, 14.5, 12.9; HRMS(ESI): calcd. for  $\text{C}_{56}\text{H}_{78}\text{O}_{20}\text{Na}^+[\text{M}+\text{Na}]^+$ , 1093.4978; found 1093.4981.

### Synthesis of compound 24

The titled compound was prepared from **29** (55 mg, 0.051 mmol) by following a similar procedure to that for compound **1** to give **24** as a white foamy solid (36 mg, 92%):  $[\alpha]_D^{25} = +124$  ( $c$  0.3,  $\text{CH}_3\text{OH}$ );  $^1\text{H}$  NMR (400 MHz, Pyridine- $d_5$ ):  $\delta$  6.40-5.48 (*br s*, 8H, OH), 5.22 (d,  $J = 7.6$  Hz, 1H, H-1<sup>II</sup>), 4.86 (d,  $J = 7.6$  Hz, 1H, H-1<sup>I</sup>), 4.63-4.48 (m, 4H), 4.40 (t,  $J = 8.4$  Hz, 1H), 4.25-3.91 (m, 8H), 3.93-3.84 (m, 1H), 3.81-3.77 (m, 1H), 3.54-3.41 (m, 2H, H-26), 2.19-2.11 (m, 1H), 1.97-1.82 (m, 2H), 1.78-1.69 (m, 2H), 1.56-0.74 (m, 19H), 1.07 (d,  $J = 7.2$  Hz, 3H, Me-21), 0.75 (s, 3H, Me-19), 0.66 (s, 3H, Me-18), 0.63 (d,  $J = 5.2$  Hz, 3H, Me-27), 0.59-0.46 (m, 1H);  $^{13}\text{C}$  NMR (100 MHz, Pyridine- $d_5$ ):  $\delta$  109.4, 107.4, 103.7, 84.9, 81.3, 80.3, 78.9, 78.7, 76.1, 75.9, 75.4, 73.3, 72.4, 70.6, 67.0, 65.8, 63.3, 61.1, 56.5, 54.6, 45.9, 44.8, 42.2, 41.0, 40.2, 37.0, 34.8, 34.2, 32.4, 32.3, 32.0, 30.8, 29.4, 28.3, 21.6, 17.5, 16.8, 15.2, 13.6; HRMS(ESI): calcd. for  $\text{C}_{39}\text{H}_{64}\text{O}_{14}\text{Na}^+[\text{M}+\text{Na}]^+$ , 779.4188; found 779.4187.

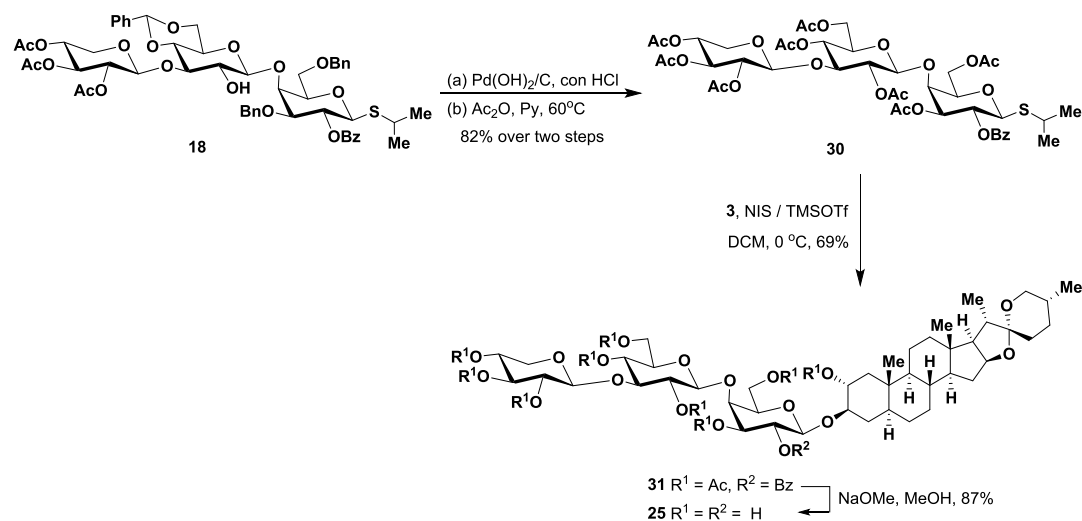

**Scheme S3.** Synthesis of trisaccharide analogue **25**

### Synthesis of compound 30

The titled compound was prepared from **18** (77 mg, 0.075 mmol) by following a similar procedure to that for compound **20** to give **30** as a white foamy solid (60 mg, 82%):  $[\alpha]_D^{25} = -22$  ( $c$  0.3,  $\text{CHCl}_3$ );  $^1\text{H}$  NMR (400 MHz,  $\text{CDCl}_3$ ):  $\delta$  8.01-7.99 (m, 2H), 7.60-7.58 (m, 1H), 7.48-7.45 (m, 2H, Ph), 5.41 (t,  $J = 9.6$  Hz, 1H, H-2<sup>I</sup>), 5.15-5.05 (m, 2H), 5.03-4.97 (m, 2H), 4.91-4.86 (m, 1H), 4.83-4.76 (m, 1H), 4.61 (d,  $J = 7.6$  Hz, 1H, H-1<sup>III</sup>), 4.60 (m, 1H), 4.46 (d,  $J = 8.0$  Hz, 1H, H-1<sup>I</sup>), 4.32 (dd,  $J = 12.0, 5.2$  Hz, 1H), 4.22-4.08 (m, 5H), 3.89 (t,  $J = 9.2$  Hz, 1H), 3.80 (t,  $J = 5.2$  Hz, 1H), 3.59 (d,  $J = 6.8$  Hz, 1H), 3.41-3.36 (m, 1H), 3.26-3.20 (m, 1H, SCH), 2.30-2.03 (m, 24H, 8  $\times$  Ac),

1.30-1.24 (m, 6H, 2 CH<sub>3</sub>). <sup>13</sup>C NMR (100 MHz, CDCl<sub>3</sub>): δ 171.1, 170.8, 170.4, 170.3, 170.1, 169.7, 169.5, 169.3, 165.2, 133.5, 130.0 (d), 129.8, 128.7 (d), 101.4, 101.3, 83.4, 80.2, 77.5, 76.0, 74.6, 74.4, 73.0, 71.9, 70.9, 70.3, 68.9, 68.4, 64.0, 62.3, 62.0, 35.2, 24.8, 23.9, 21.11, 21.05, 21.0 (d), 20.96, 20.94 (d), 20.8; HRMS(ESI): calcd. for C<sub>43</sub>H<sub>56</sub>O<sub>23</sub>Na<sup>+</sup>[M+Na]<sup>+</sup>, 995.2825; found 995.2825.

### Synthesis of compound 31

The titled compound was prepared from compound **30** (117 mg, 0.12 mmol) and compound **3** (48 mg, 0.10 mmol) by following a similar procedure to that for compound **21** to afford **31** as a white foamy solid (95 mg, 69%):  $[\alpha]_D^{25} = -57$  (c 0.5, CHCl<sub>3</sub>); <sup>1</sup>H NMR (400 MHz, CDCl<sub>3</sub>): δ 8.01-7.98 (m, 2H), 7.60-7.58 (m, 1H), 7.47-7.43 (m, 2H, Ph), 5.26 (dd, *J* = 10.0, 8.0 Hz, 1H, H-2<sup>I</sup>), 5.11-5.01 (m, 2H), 5.01-4.97 (m, 2H), 4.91-4.80 (m, 3H), 4.63 (d, *J* = 7.6 Hz, 1H, H-1<sup>III</sup>), 4.59-4.53 (m, 2H), 4.39-4.34 (m, 1H, H-16), 4.30-4.04 (m, 6H), 3.89 (t, *J* = 9.2 Hz, 1H), 3.74 (t, *J* = 5.2 Hz, 1H), 3.62-3.56 (m, 2H), 3.49-3.32 (m, 3H), 2.30-1.94 (m, 27H, 9 × Ac), 1.87-0.82 (m, 24H), 0.94 (d, *J* = 6.8 Hz, 3H, Me-21), 0.78 (d, *J* = 6.4 Hz, 3H, Me-27), 0.77 (s, 3H, Me-19), 0.71 (s, 3H, Me-18), 0.68-0.59 (m, 1H); <sup>13</sup>C NMR (100 MHz, CDCl<sub>3</sub>): δ 170.8, 170.5, 170.5, 170.2, 170.1, 169.9, 169.5, 169.3, 169.2, 165.8, 133.3, 129.7 (t), 128.4 (d), 109.2, 101.2, 100.5, 99.8, 80.8, 80.5, 79.7, 77.3, 73.5, 72.9, 72.7, 72.5, 71.9, 71.8, 70.9, 70.2, 70.0, 68.8, 68.7, 66.8, 63.2, 62.12, 62.08, 61.9, 56.1, 54.1, 44.2, 42.4, 41.6, 40.5, 39.8, 37.0, 34.3, 33.5, 32.0, 31.7, 31.3, 30.3, 28.8, 27.6, 21.1, 20.9 (d), 20.80, 20.77, 20.7 (d), 20.69, 20.5, 17.1, 16.4, 14.5, 12.9. HRMS(ESI): calcd. for C<sub>69</sub>H<sub>94</sub>O<sub>28</sub>Na<sup>+</sup>[M+Na]<sup>+</sup>, 1393.5822; found 1393.5822.

### Synthesis of compound 25

The titled compound was prepared from compound **31** (45 mg, 0.033 mmol) by following a similar procedure to that for compound **1** to afford **25** as a white foamy solid (26 mg, 87%):  $[\alpha]_D^{25} = -42$  (c 0.7, CH<sub>3</sub>OH); <sup>1</sup>H NMR (400 MHz, Pyridine-d<sub>5</sub>): δ 6.65-6.24 (*br s*, 10H, OH), 5.22 (d, *J* = 7.6 Hz, 1H, H-1<sup>II</sup>), 5.20 (d, *J* = 7.6 Hz, 1H, H-1<sup>III</sup>), 4.86 (d, *J* = 7.6 Hz, 1H, H-1<sup>I</sup>), 4.62 (d, *J* = 2.0 Hz, 1H, H-4<sup>I</sup>), 4.62-4.45 (m, 3H), 4.37 (t, *J* = 8.8 Hz, 1H), 4.26-4.03 (m, 9H), 4.97-4.88 (m, 4H), 3.80-3.77 (m, 1H), 3.66-3.61 (m, 1H), 3.56-3.46 (m, 2H, H-26), 2.18-0.72 (m, 24H), 1.08 (d, *J* = 6.8 Hz, 3H, Me-21), 0.77 (s, 3H, Me-19), 0.67 (s, 3H, Me-18), 0.65 (d, *J* = 4.8 Hz, 3H, Me-27), 0.61-0.51 (m, 1H); <sup>13</sup>C NMR (100 MHz, Pyridine-d<sub>5</sub>): δ 109.4, 106.7, 106.1, 103.7, 87.3, 84.9, 81.3, 80.1, 78.3, 78.3, 75.9, 75.4, 75.2, 75.1, 73.1, 71.1, 70.6, 70.2, 67.5, 67.0, 63.2, 62.9, 61.0, 56.5, 54.6, 52.2, 45.9, 44.8, 42.2, 40.9, 40.2, 37.0, 34.8, 34.2, 32.4, 32.0, 30.8, 29.4, 28.3, 21.6, 17.5, 16.8, 15.2, 13.6; HRMS(ESI): calcd. for C<sub>44</sub>H<sub>72</sub>O<sub>18</sub>Na<sup>+</sup>[M+Na]<sup>+</sup>, 911.4610; found 911.4613.

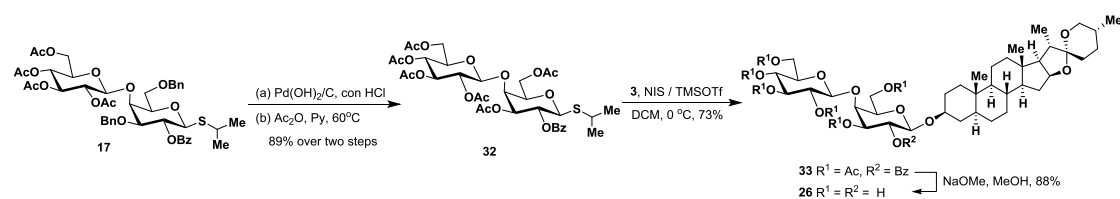

Scheme S4. Synthesis of disaccharide analogue **24**

### Synthesis of compound 32

The titled compound was prepared from **17** (93 mg, 0.11 mmol) by following a similar procedure to that for compound **20** to give **32** as a colorless syrup (83 mg, 89%):  $[\alpha]_D^{25} = +6$  (c 0.6, CHCl<sub>3</sub>); <sup>1</sup>H NMR (400 MHz, CDCl<sub>3</sub>)  $\delta$  7.97 (d,  $J = 7.6$  Hz, 2H), 7.59-7.55 (m, 1H), 7.43 (d,  $J = 7.2$  Hz, 2H, Ph), 5.41 (t,  $J = 10.0$  Hz, 1H, H-2<sup>I</sup>), 5.23 (t,  $J = 9.2$  Hz, 1H, H-3<sup>II</sup>), 5.15-5.02 (m, 3H, H-3<sup>I</sup>, H-2<sup>II</sup> and H-4<sup>II</sup>), 4.61 (d,  $J = 9.6$  Hz, 1H, H-1<sup>I</sup>), 4.56 (d,  $J = 8.0$  Hz, 1H, H-1<sup>II</sup>), 4.30 (dd,  $J = 12.0, 4.8$  Hz, 1H, H-6a<sup>I</sup>), 4.23-4.09 (m, 4H, H-4<sup>I</sup>, H-6a/b<sup>II</sup> and H-6b<sup>I</sup>), 3.80 (t,  $J = 5.6$  Hz, 1H, H-5<sup>I</sup>), 3.64 (dt,  $J = 6.8, 3.6$  Hz, 1H, H-5<sup>II</sup>), 3.20 (p,  $J = 6.4$  Hz, 1H, SCH), 2.20 (s, 3H), 2.09 (s, 3H), 2.05-2.01 (12H, 4  $\times$  Ac), 1.28 (d,  $J = 6.8$  Hz, 3H, CH<sub>3</sub>), 1.24 (d,  $J = 6.8$  Hz, 3H, CH<sub>3</sub>). <sup>13</sup>C NMR (100 MHz, CDCl<sub>3</sub>)  $\delta$  170.8, 170.6, 170.4, 170.3, 169.5, 169.4, 165.0, 133.3, 129.8 (d), 129.5, 128.5 (d), 101.2, 83.3, 75.8, 74.4, 74.3, 72.5, 71.7, 71.3, 68.5, 68.1, 63.6, 61.8, 35.1, 24.6, 23.7, 20.9, 20.8 (d), 20.7, 20.6 (d). HRMS(ESI): calcd. for C<sub>34</sub>H<sub>44</sub>O<sub>17</sub>SNa<sup>+</sup> [M+Na]<sup>+</sup>, 779.2191; found 779.2190.

### Synthesis of compound 33

The titled compound was prepared from **32** (30 mg, 0.040 mmol) by following a similar procedure to that for compound **21** to give **33** as a white foamy solid (32 mg, 73%):  $[\alpha]_D^{25} = -9$  (c 0.7, CHCl<sub>3</sub>); <sup>1</sup>H NMR (400 MHz, CDCl<sub>3</sub>)  $\delta$  7.97 (dd,  $J = 8.0, 1.2$  Hz, 2H), 7.58-7.54 (m, 1H), 7.43 (d,  $J = 7.6$  Hz, 2H), 5.30 (dd,  $J = 10.4, 8.0$  Hz, 1H, H-2<sup>I</sup>), 5.23 (t,  $J = 9.6$  Hz, 1H, H-3<sup>II</sup>), 5.09-5.00 (m, 3H, H-3<sup>I</sup>, H-2<sup>II</sup> and H-4<sup>II</sup>), 4.63 (d,  $J = 8.0$  Hz, 1H, H-1<sup>I</sup>), 4.56 (d,  $J = 8.0$  Hz, 1H, H-1<sup>II</sup>), 4.39-4.29 (m, 2H, H-6a<sup>I</sup> and H-16), 4.23 (dd,  $J = 11.6, 6.8$  Hz, 1H, H-6b<sup>I</sup>), 4.17-4.09 (m, 3H, H-4<sup>I</sup>, H-6a/b<sup>II</sup> and H-6b<sup>I</sup>), 3.75 (t,  $J = 6.0$  Hz, 1H, H-5<sup>I</sup>), 3.63 (ddd,  $J = 10.0, 4.0, 2.8$  Hz, 1H, H-5<sup>II</sup>), 3.56-3.43 (m, 2H, H-3 and H-26a), 3.35 (t,  $J = 11.2$  Hz, 1H, H-26b), 2.20 (s, 3H), 2.08 (s, 3H), 2.05 (s, 3H), 2.02-2.01 (9H, 3  $\times$  Ac), 1.93 (ddd,  $J = 12.0, 7.6, 5.2$  Hz, 1H), 1.87-1.80 (m, 2H), 1.74-0.75 (m, 23H), 0.94 (d,  $J = 6.4$  Hz, 3H, Me-21), 0.77 (d,  $J = 6.4$  Hz, 3H, Me-23), 0.71 (s, 3H, Me-19), 0.66 (s, 3H, Me-18), 0.61-0.55 (m, 1H); <sup>13</sup>C NMR (100 MHz, CDCl<sub>3</sub>)  $\delta$  170.8, 170.5, 170.5, 170.4, 169.6, 169.3, 164.9, 133.2, 129.8 (d), 129.7, 128.4 (d), 109.3, 101.2, 99.8, 80.9, 79.5, 77.3, 74.3, 73.3, 72.6, 71.8, 71.7, 71.4, 69.9, 68.5, 66.9, 63.3, 62.2, 61.8, 56.3, 54.3, 44.7, 41.6, 40.6, 40.0, 36.9, 35.6, 35.1, 34.7, 32.2, 31.8, 31.4, 30.3, 29.1, 28.8, 28.6, 21.0, 20.9, 20.8 (d), 20.7, 20.6, 17.2, 16.5, 14.5, 12.2; HRMS (ESI): calcd. for C<sub>58</sub>H<sub>80</sub>O<sub>20</sub>Na<sup>+</sup> [M + Na]<sup>+</sup>, 1119.5135; found 1119.5133.

### Synthesis of compound 26

The titled compound was prepared from compound **31** (18 mg, 0.016 mmol) by following a similar procedure to that for compound **1** to afford **26** as a white foamy solid (11 mg, 87%):  $[\alpha]_D^{25} = -41$  (c 0.4, CH<sub>3</sub>OH). <sup>1</sup>H NMR (400 MHz, Pyridine-*d*<sub>5</sub>)  $\delta$  6.32-5.90 (*br s*, 7H, OH), 5.29 (d,  $J = 8.0$  Hz, 1H, H-1<sup>I</sup>), 4.89 (d,  $J = 7.6$  Hz, 1H, H-1<sup>II</sup>), 4.76-4.64 (m, 2H), 4.63-4.49 (m, 2H), 4.39 (dd,  $J = 9.2, 7.2$  Hz, 1H, H-3<sup>II</sup>), 4.33-4.17 (m, 4H), 4.17-3.99 (m, 4H), 3.96-3.88 (m, 1H), 3.62-3.46 (m, 3H, H-3, H-26a and H-26b), 2.09-1.91 (m, 3H), 1.83-1.76 (m, 2H), 1.73-1.50 (m, 9H), 1.46-0.73 (m, 14H), 1.13 (d,  $J = 6.8$  Hz, 3H, Me-21), 0.69 (d,  $J = 5.2$  Hz, 3H, Me-23), 0.64 (s, 3H, Me-18), 0.52 (t,  $J = 6.8$  Hz, 1H). <sup>13</sup>C NMR (100 MHz, Pyridine-*d*<sub>5</sub>)  $\delta$  109.0, 106.9, 102.3,

80.9, 79.9, 78.5, 78.3, 76.9, 75.7, 75.2, 75.0, 73.3, 72.1, 66.6, 62.9, 62.8, 60.8, 56.2, 54.2, 44.4, 41.7, 40.5, 39.9, 36.9, 35.6, 35.0, 34.6, 32.2, 31.9, 31.6, 30.4, 29.8, 29.0, 28.7, 21.0, 17.1, 16.4, 14.8, 12.0. HRMS (ESI): calcd. for  $C_{39}H_{64}O_{13}SNa^+[M+Na]^+$ , 763.4239; found 763.4237.

## 2. Bioassay experiment of gitonin and its derivatives

Cell Culture Assay: Cells were maintained in the RPMI 1640 medium containing 10% fetal bovine serum supplemented with *L*-glutamine, 100 units/mL penicillin, and 100  $\mu$ g/mL streptomycin. The leukemia cells were washed and re-suspended in the above medium to  $3 \times 10^4$  cells/mL, and 196  $\mu$ L of this cell suspension was placed in each well of a 96-well flat-bottom plate. The cells were incubated in 5%  $CO_2$ /air for 24 h at 37  $^\circ C$ . After incubation, 4  $\mu$ L of EtOH-H<sub>2</sub>O (1:1) solution containing the sample was added to give the final concentrations of 0.01-10  $\mu$ g/mL; 4  $\mu$ L of EtOH-H<sub>2</sub>O (1:1) was added into control wells. The cells were further incubated for 72 h in the presence of each agent, and then cell growth was evaluated by 3-(4,5-dimethylthiazol-2-yl)-2,5-diphenyltetrazolium bromide (MTT) assay procedure. The MTT assay was carried out according to a modified method of Sargent and Tayler as follows. After termination of the cell culture, 10  $\mu$ L of 5 mg/mL MTT in phosphate buffered saline was added to every well and the plate was further re-incubated in 5%  $CO_2$ /air for 4 h at 37  $^\circ C$ . The plate was then centrifuged to precipitate cells and formazan. An aliquot of 150  $\mu$ L of the supernatant was removed from every well, and 175  $\mu$ L of DMSO was added to dissolve the formazan crystals. The plate was mixed on a microshaker for 10 min and then read on a microplate reader at 550 nm. A dose-response curve was plotted and the concentration giving 50% inhibition ( $IC_{50}$ ) was calculated.



### 3. Copies of NMR Spectra

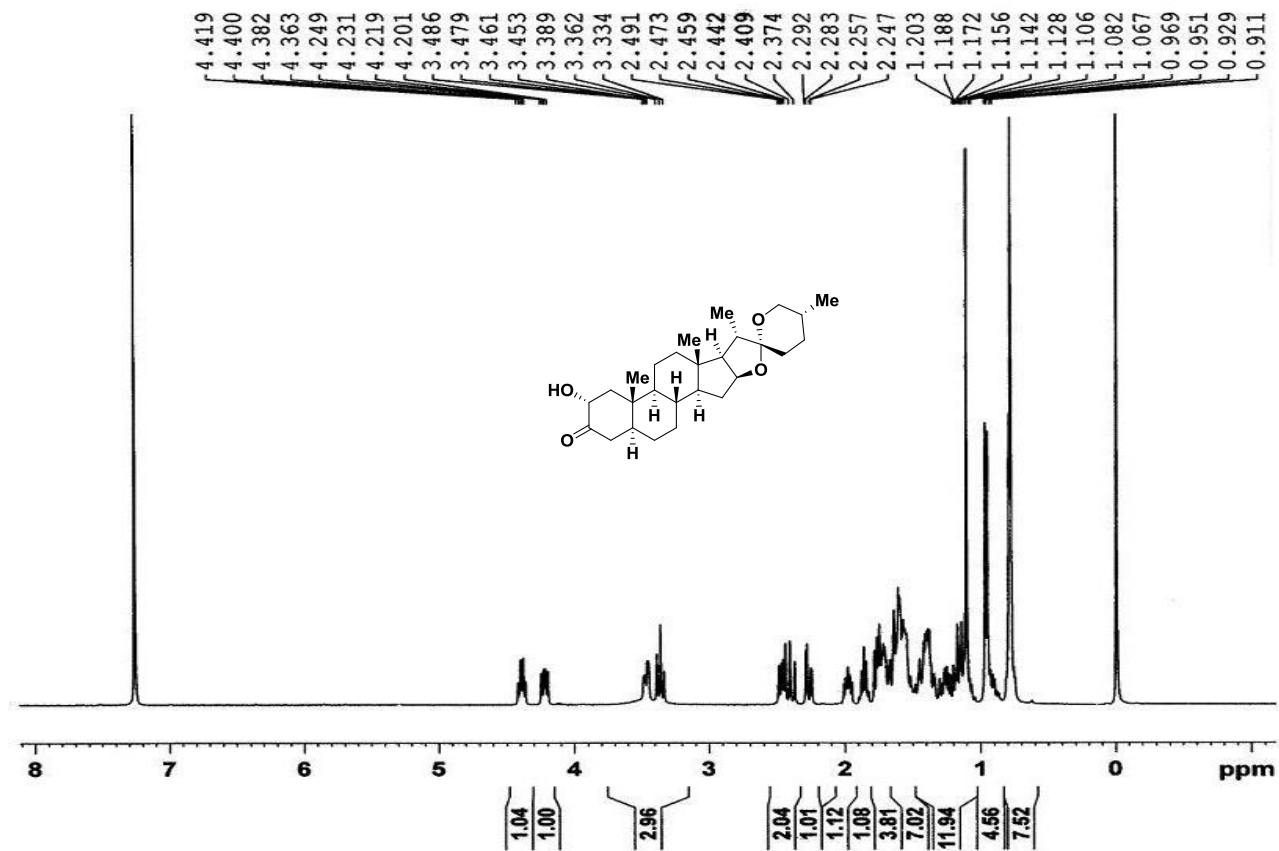

Figure 1. <sup>1</sup>H NMR (400 MHz, CDCl<sub>3</sub>) spectrum of compound 11

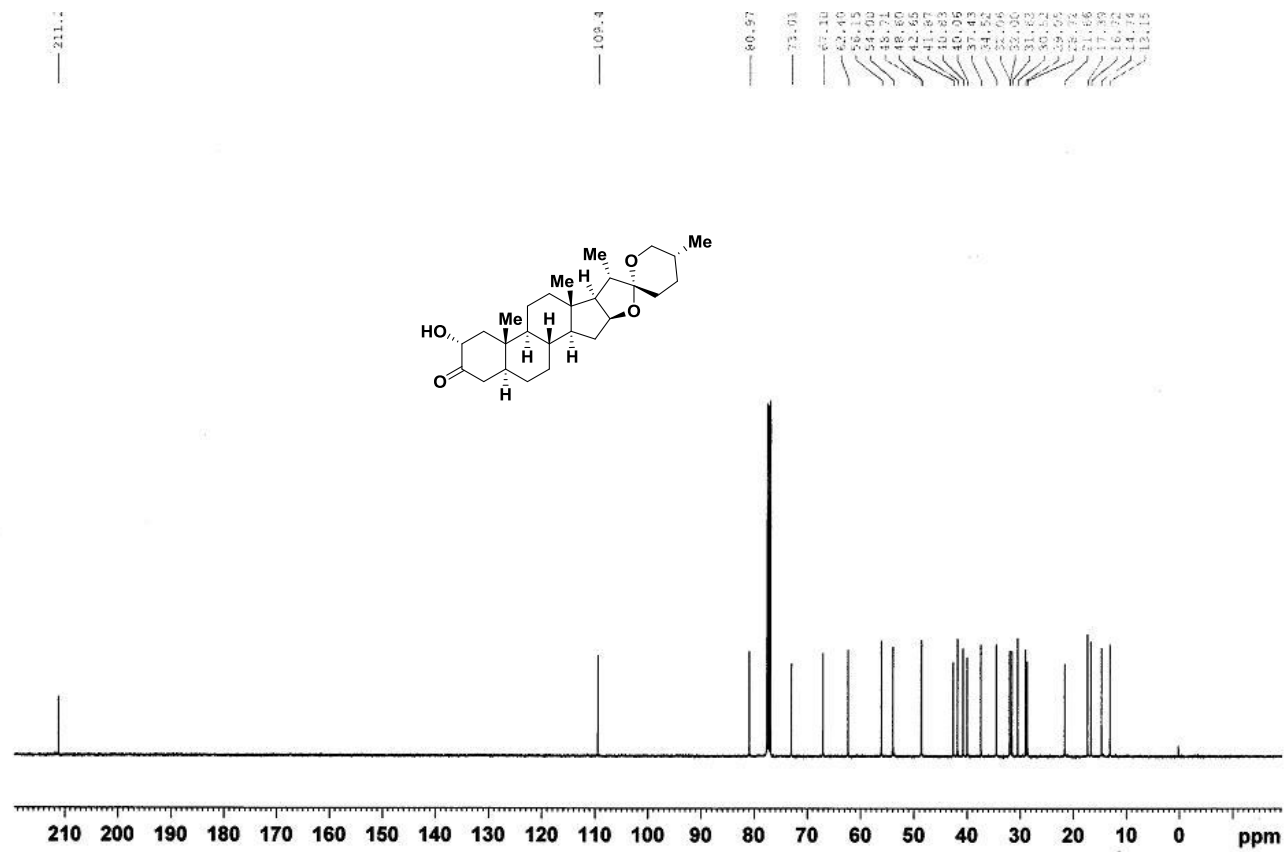

Figure 2.  $^{13}\text{C}$  NMR (100 MHz,  $\text{CDCl}_3$ ) spectrum of compound **11**

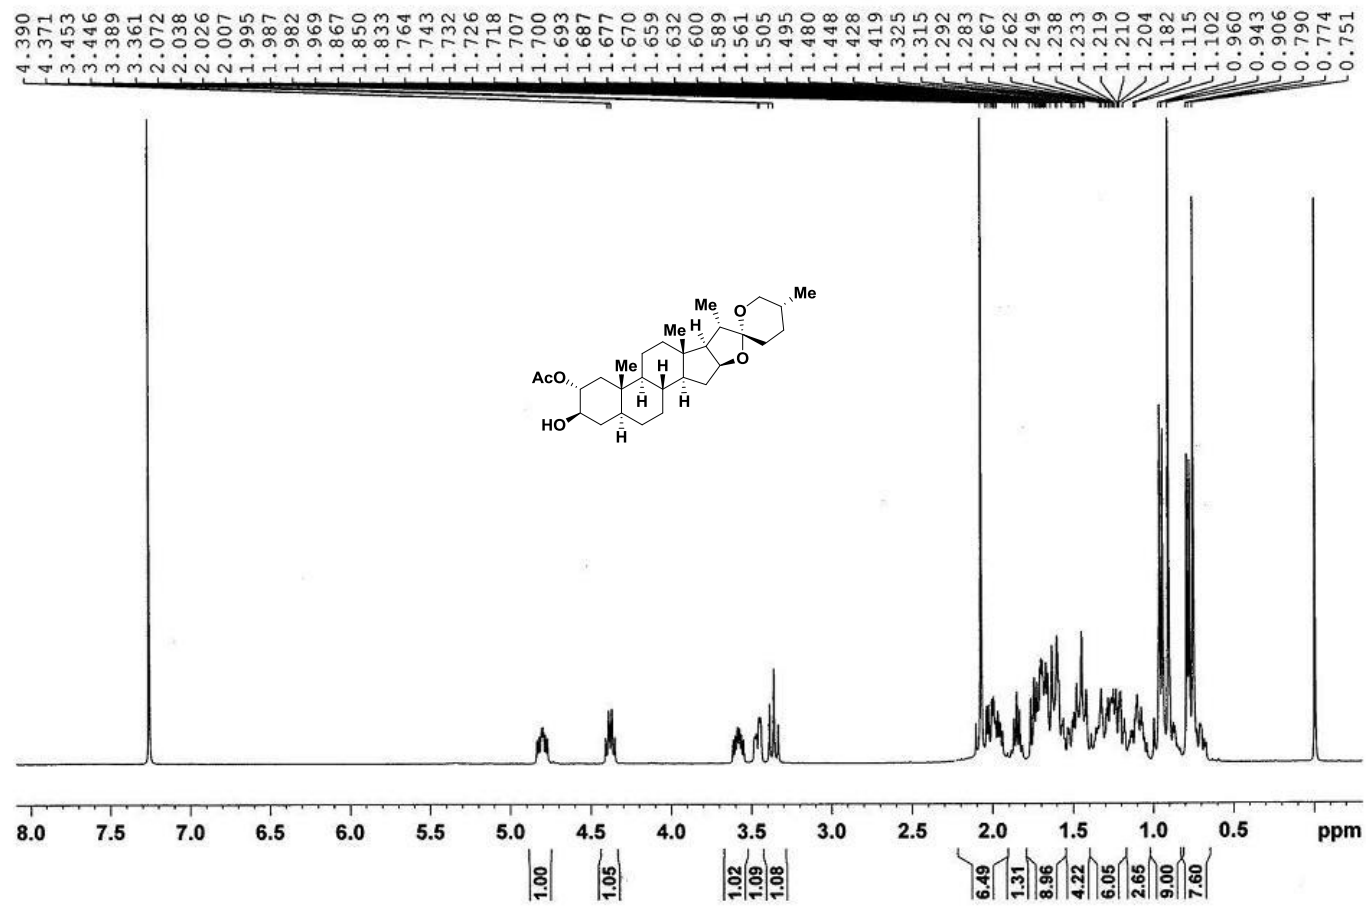

Figure 3.  $^1\text{H NMR}$  (400 MHz,  $\text{CDCl}_3$ ) spectrum of compound 3

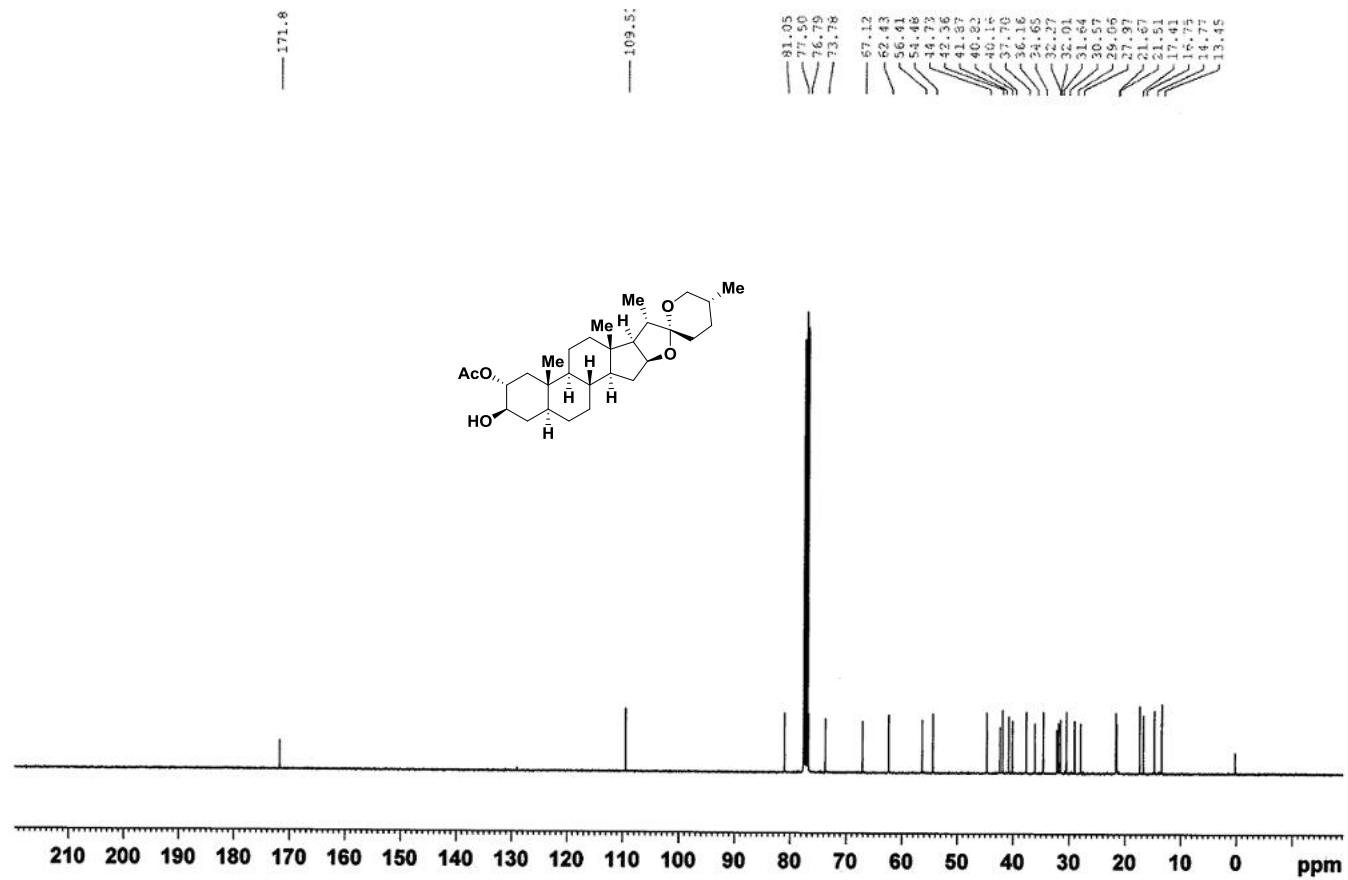

Figure 4.  $^{13}\text{C}$  NMR (100 MHz,  $\text{CDCl}_3$ ) spectrum of compound 3

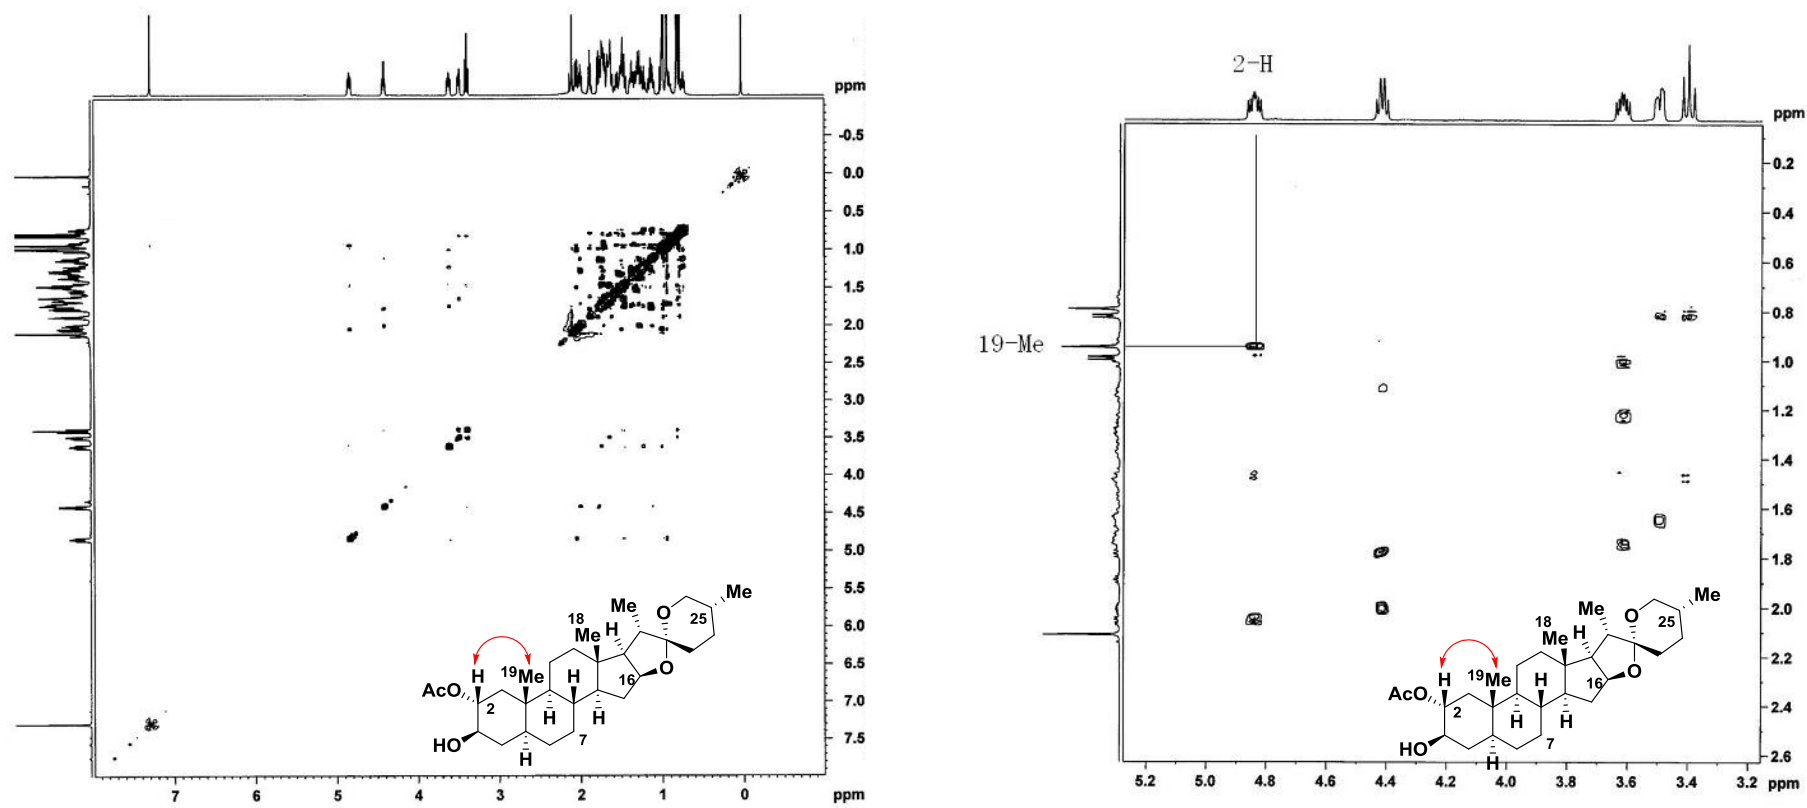

Figure 5. NOESY (400 MHz, CDCl<sub>3</sub>) spectrum of compound 3

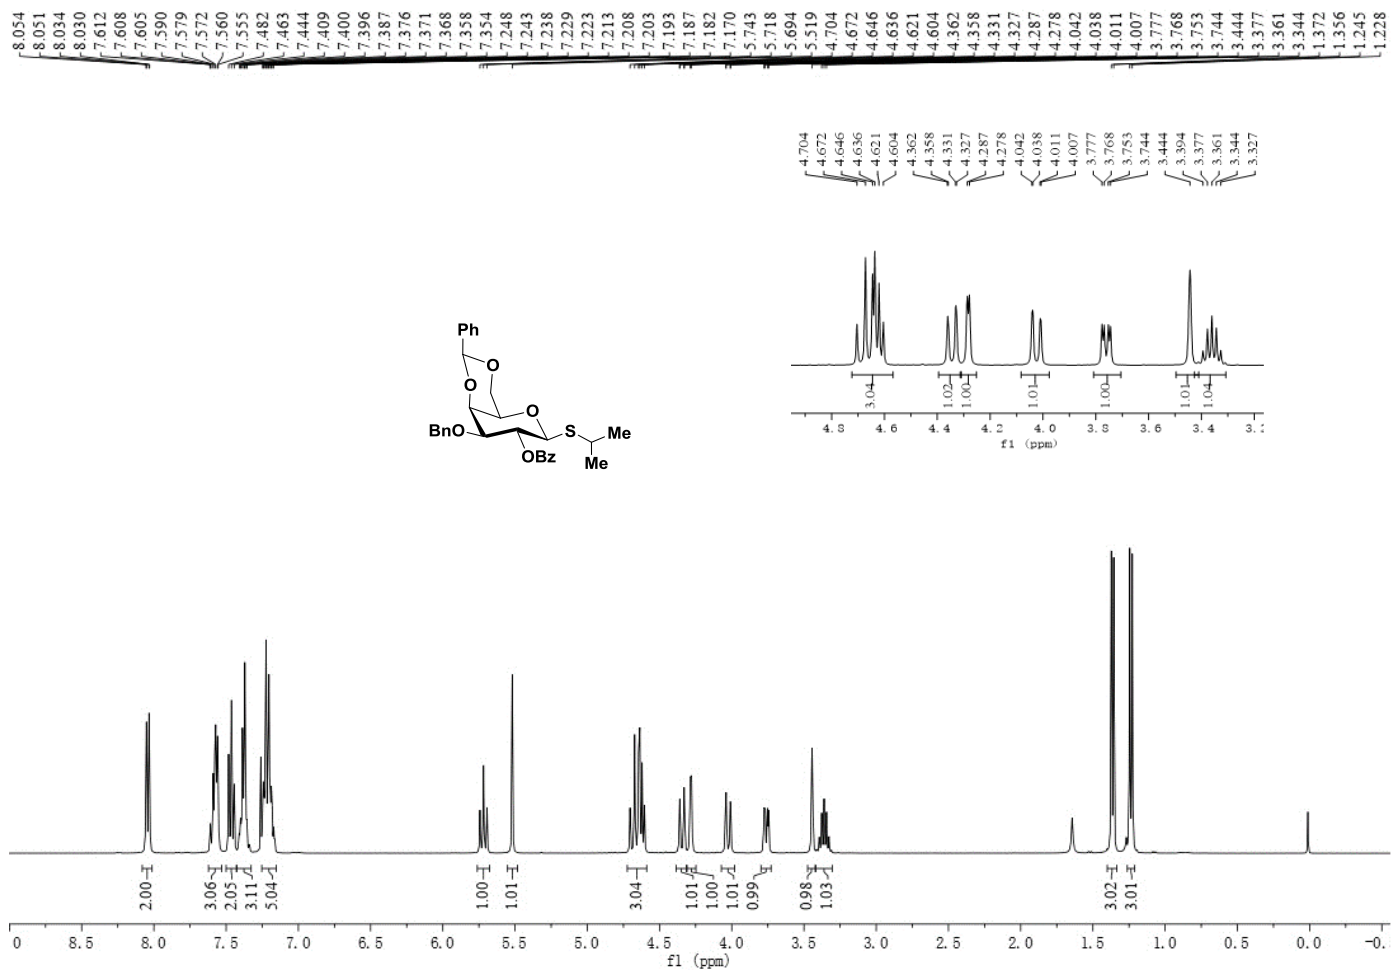

**Figure 6. <sup>1</sup>H NMR (400 MHz, CDCl<sub>3</sub>) spectrum of compound 14**

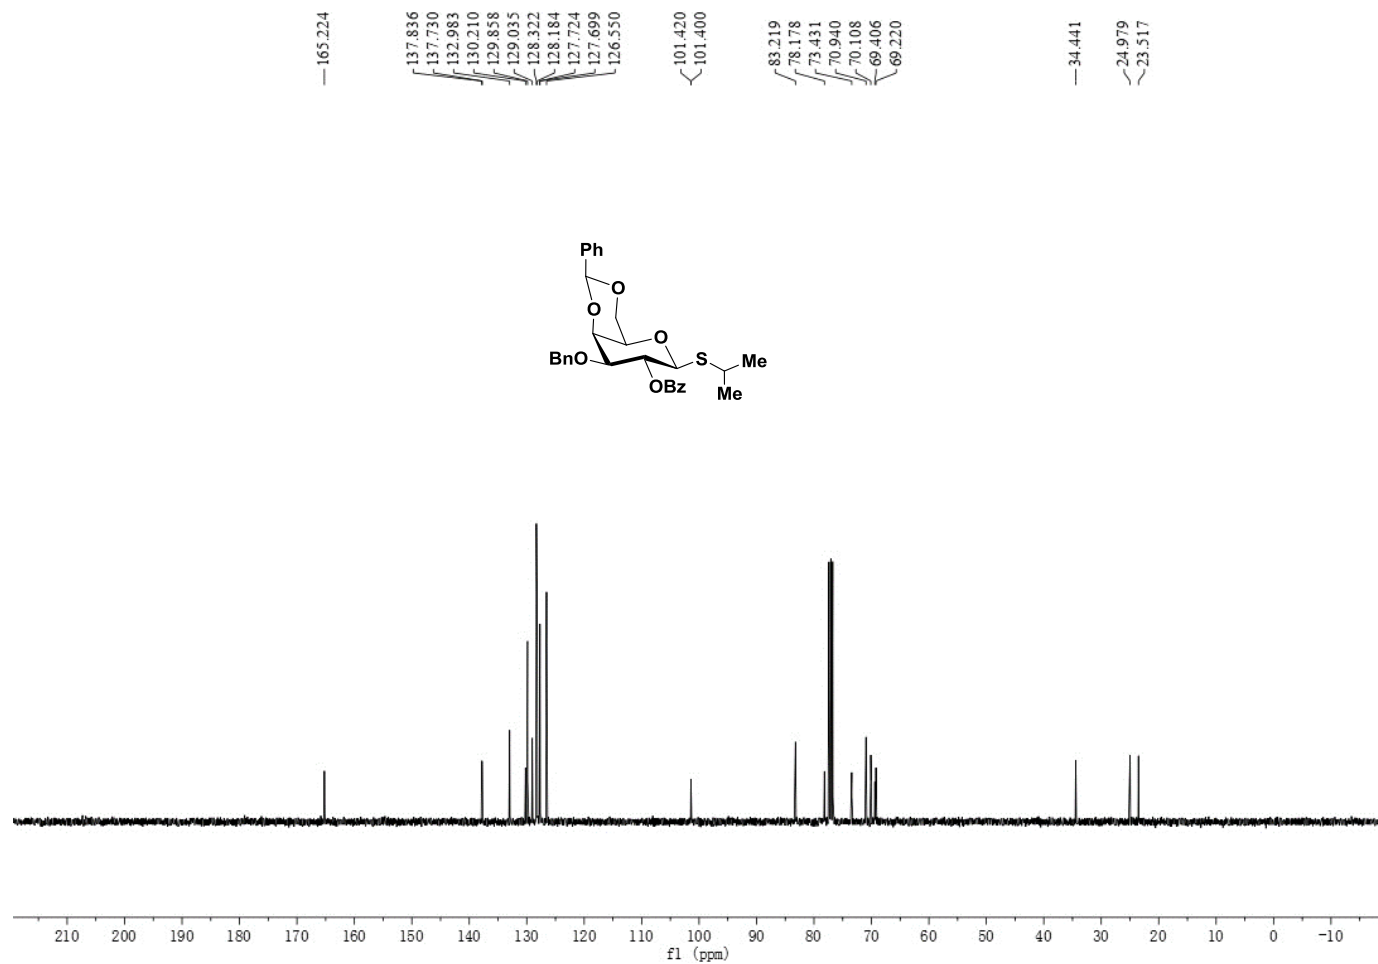

**Figure 7.**  $^{13}\text{C}$  NMR (100 MHz,  $\text{CDCl}_3$ ) spectrum of compound **14**

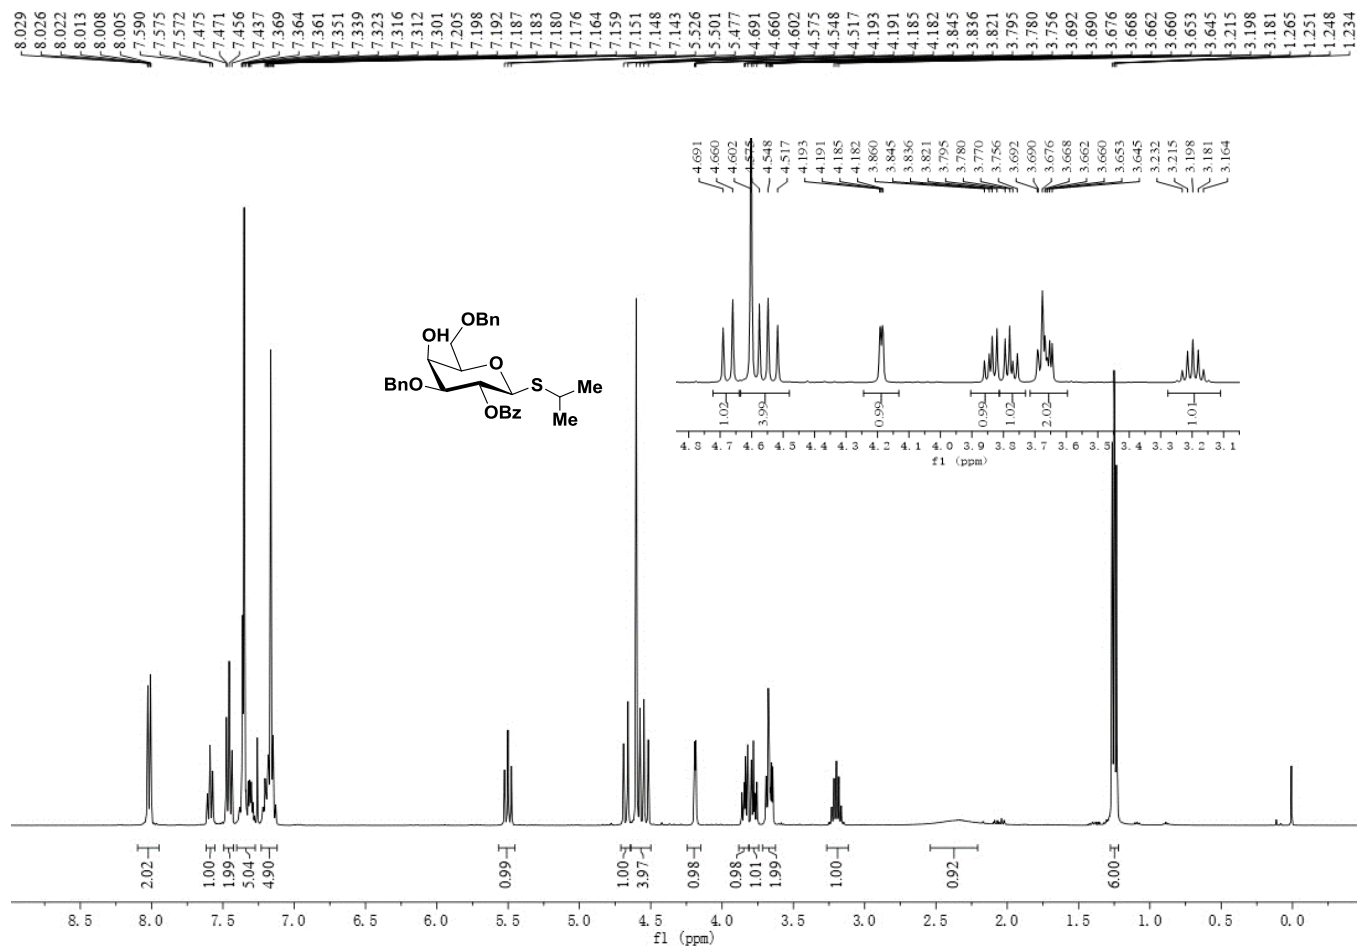

Figure 8. <sup>1</sup>H NMR (400 MHz, CDCl<sub>3</sub>) spectrum of compound 15



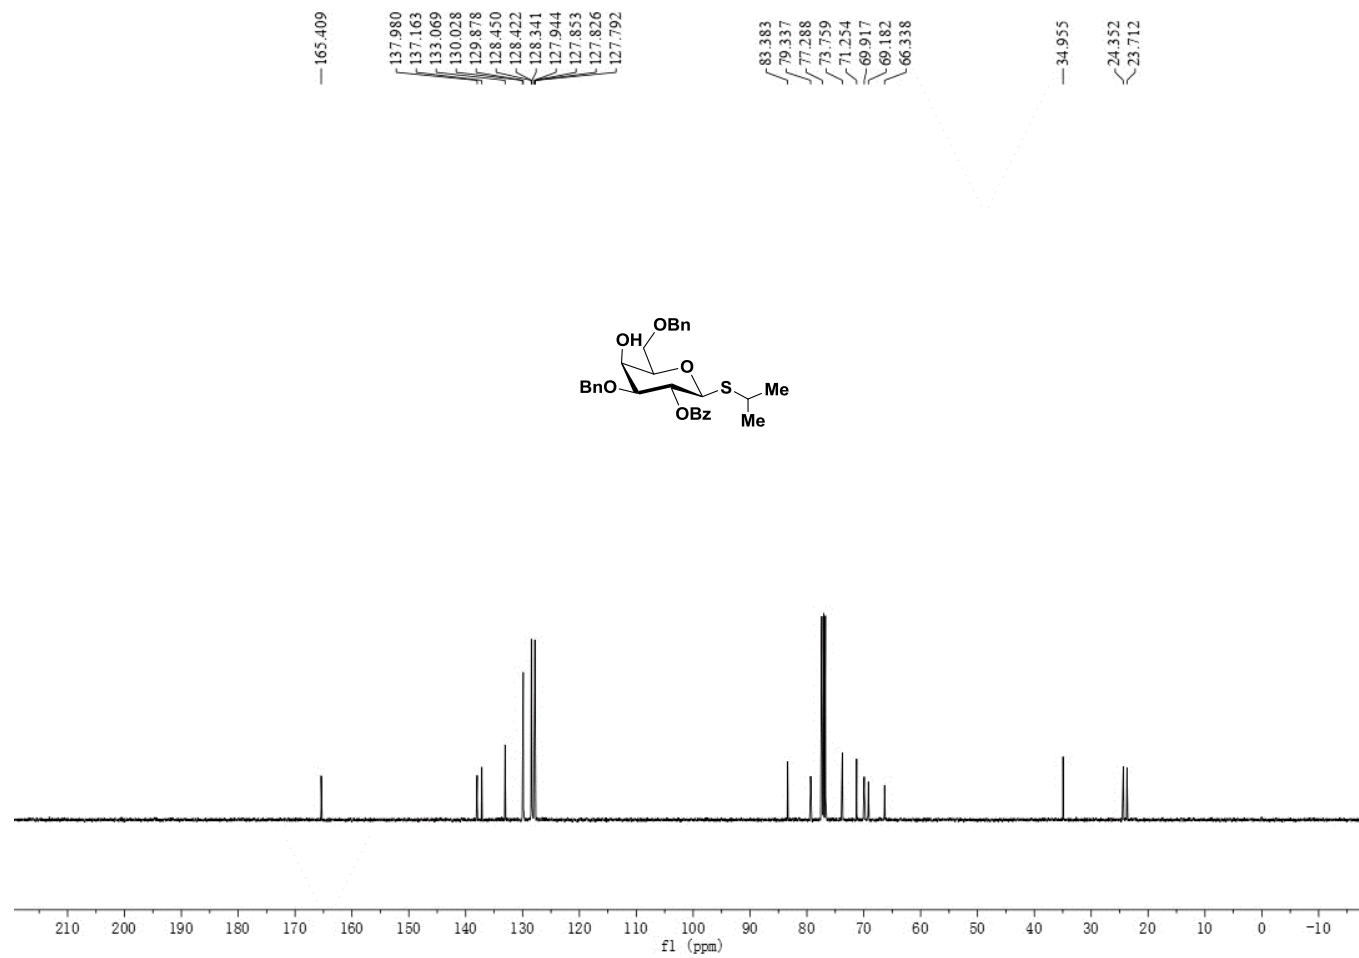

**Figure 9.** <sup>13</sup>C NMR (100 MHz, CDCl<sub>3</sub>) spectrum of compound **15**

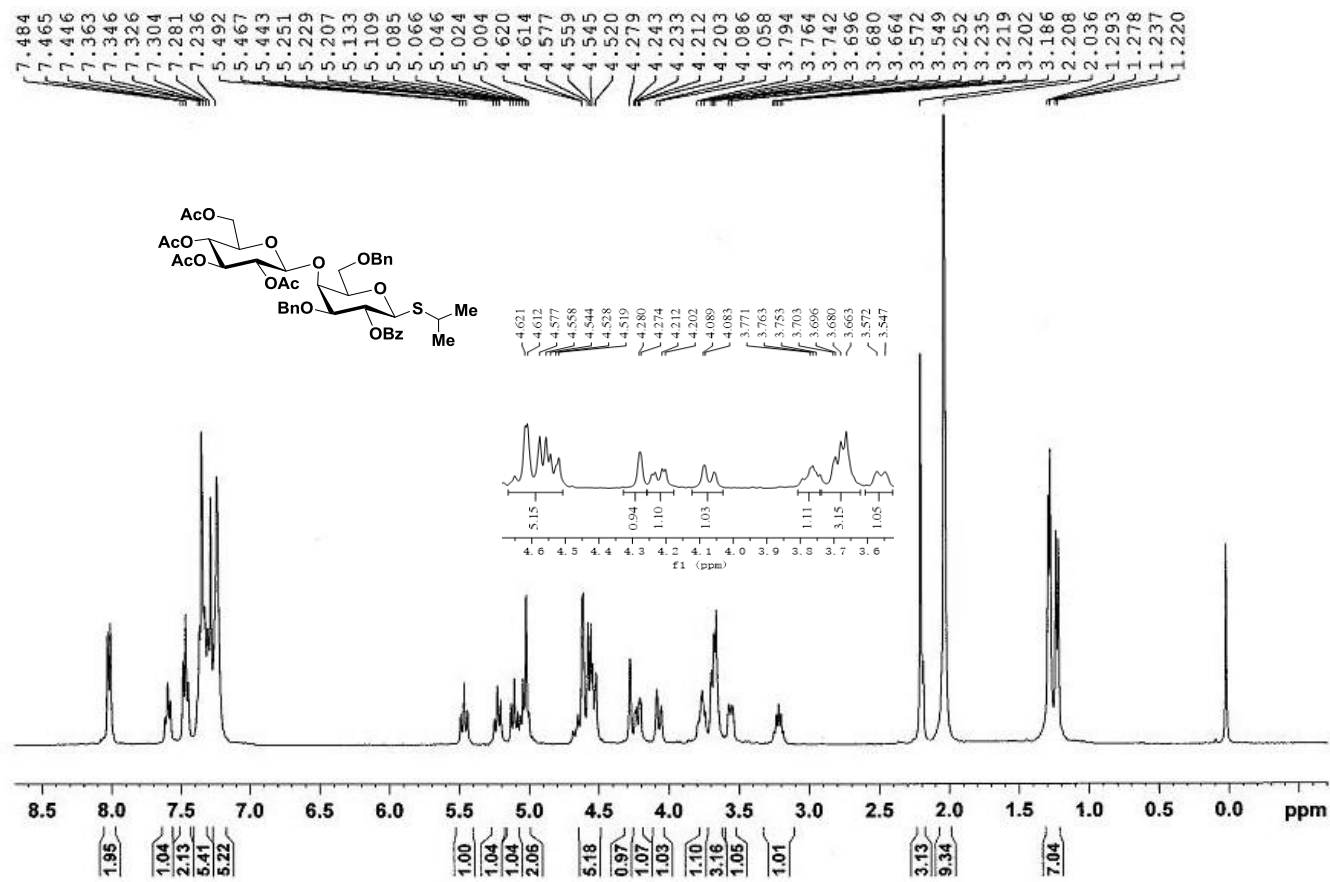

Figure 10. <sup>1</sup>H NMR (400 MHz, CDCl<sub>3</sub>) spectrum of compound 17

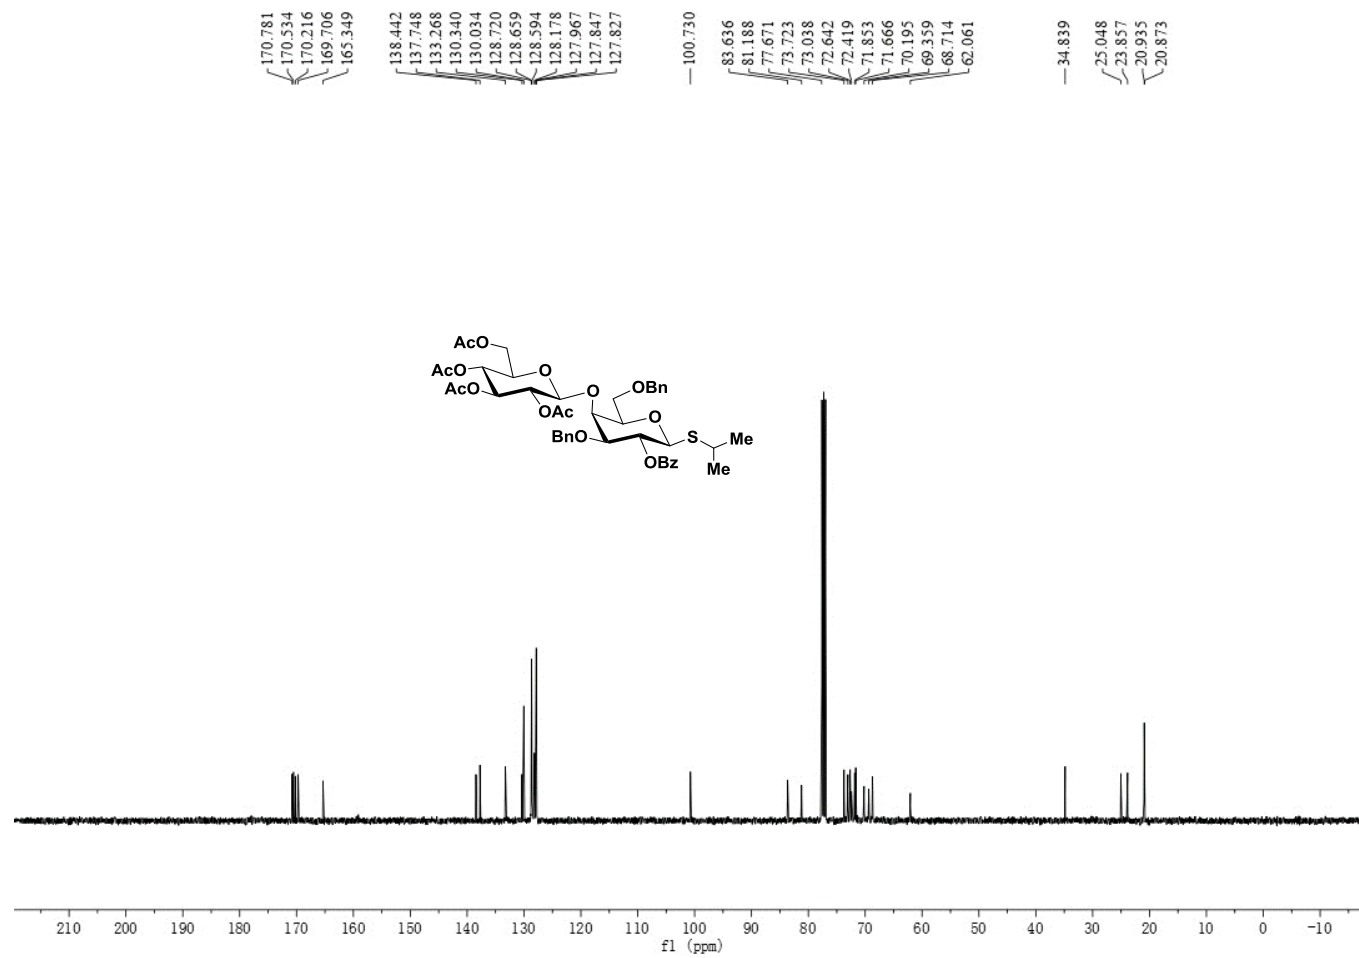

Figure 11. <sup>13</sup>C NMR (100 MHz, CDCl<sub>3</sub>) spectrum of compound 17

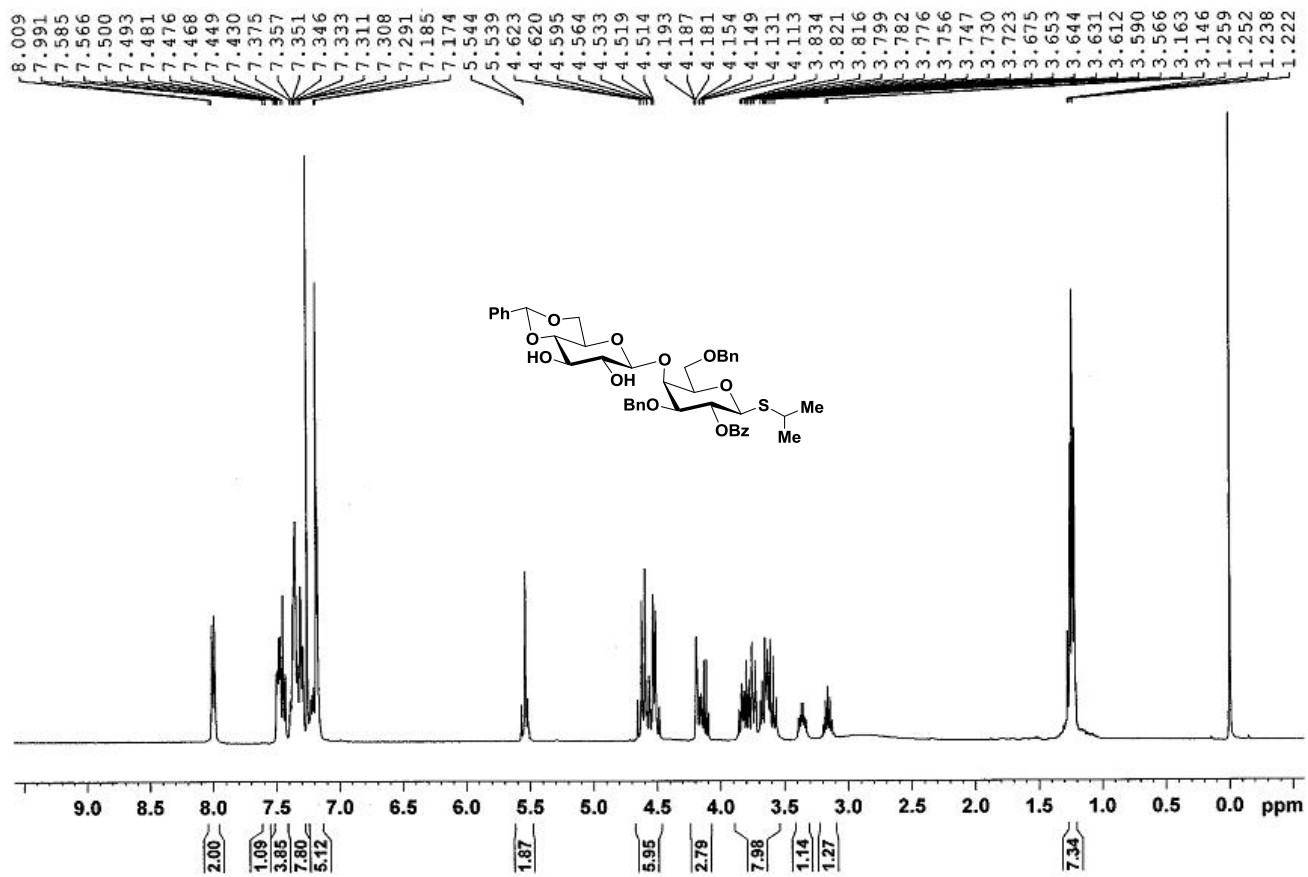

Figure 12. <sup>1</sup>H NMR (400 MHz, CDCl<sub>3</sub>) spectrum of compound 4

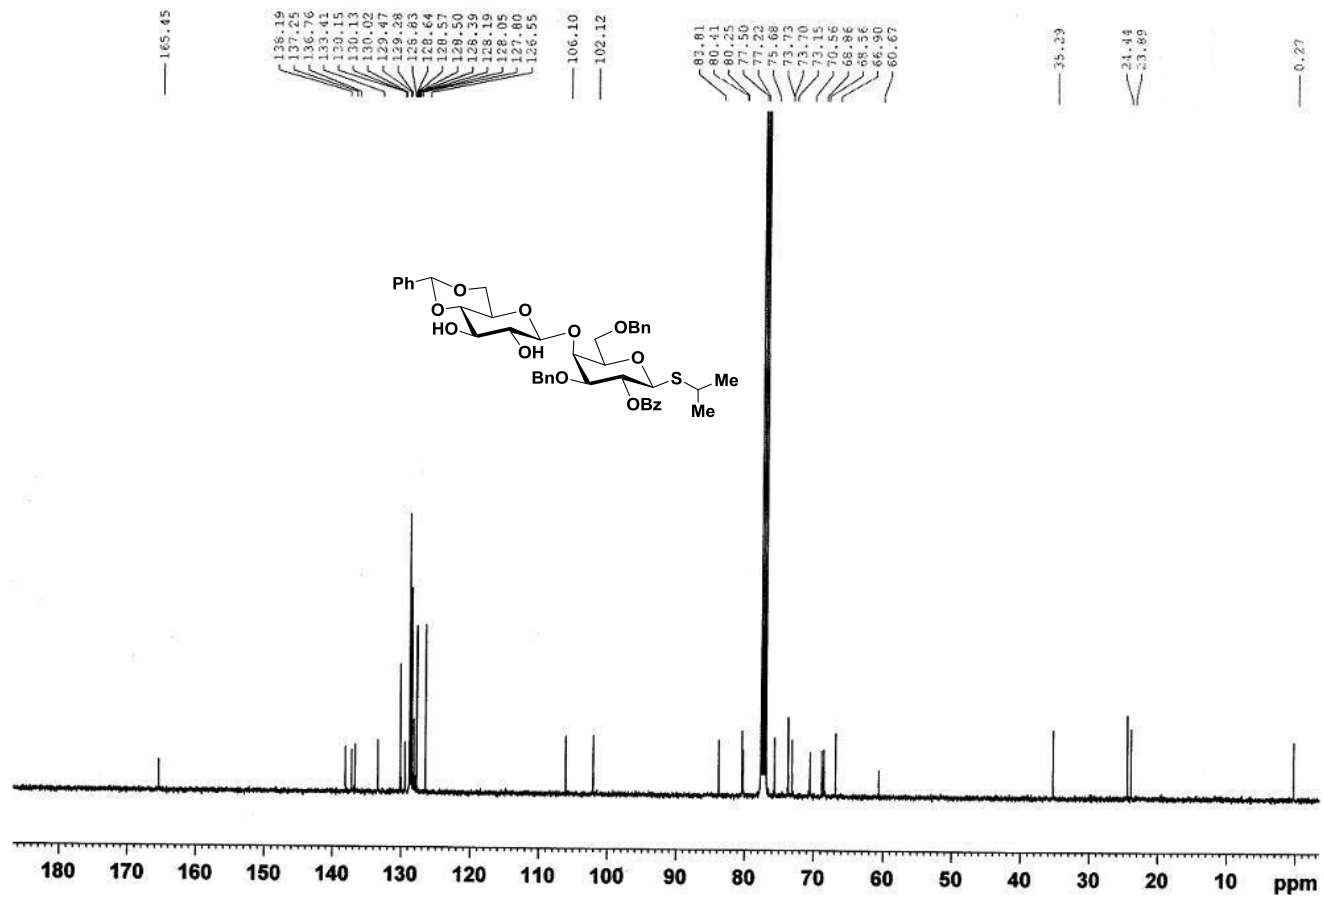

Figure 13.  $^{13}\text{C}$  NMR (100 MHz,  $\text{CDCl}_3$ ) spectrum of compound 4

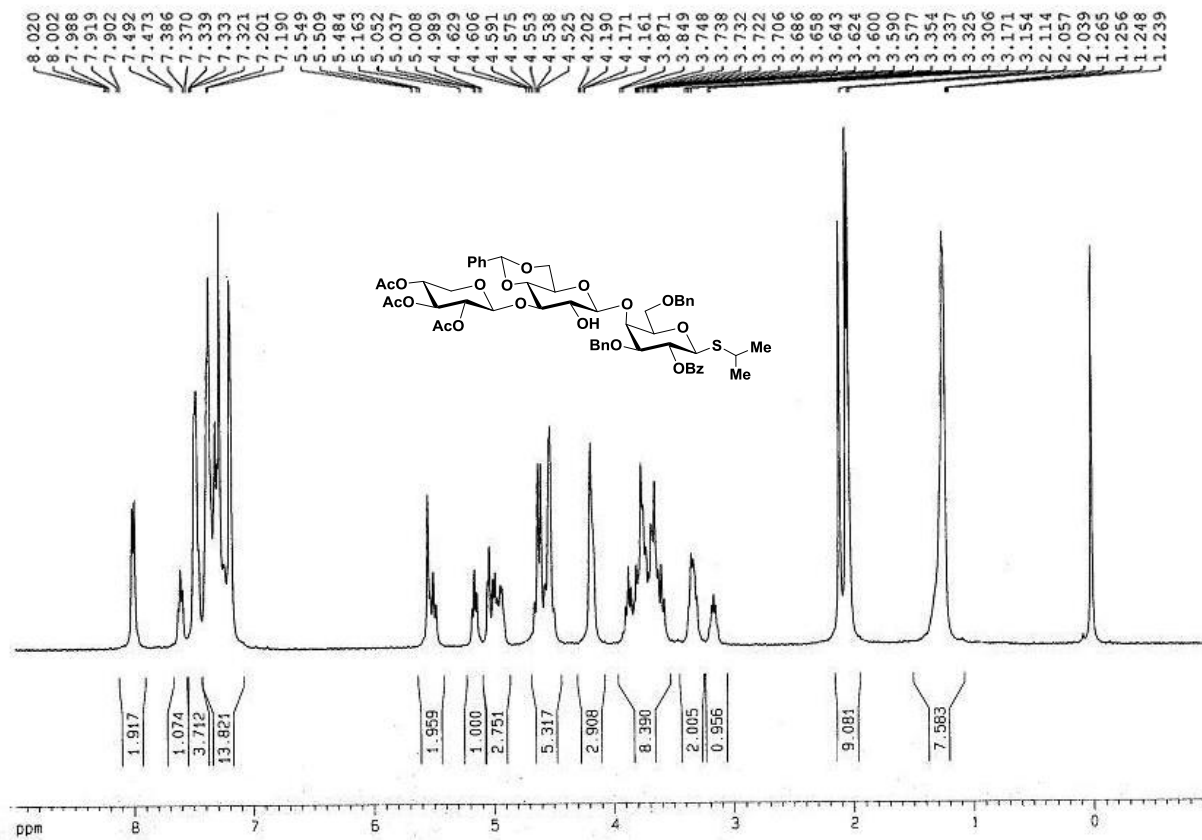

Figure 14. <sup>1</sup>H NMR (400 MHz, CDCl<sub>3</sub>) spectrum of compound 18

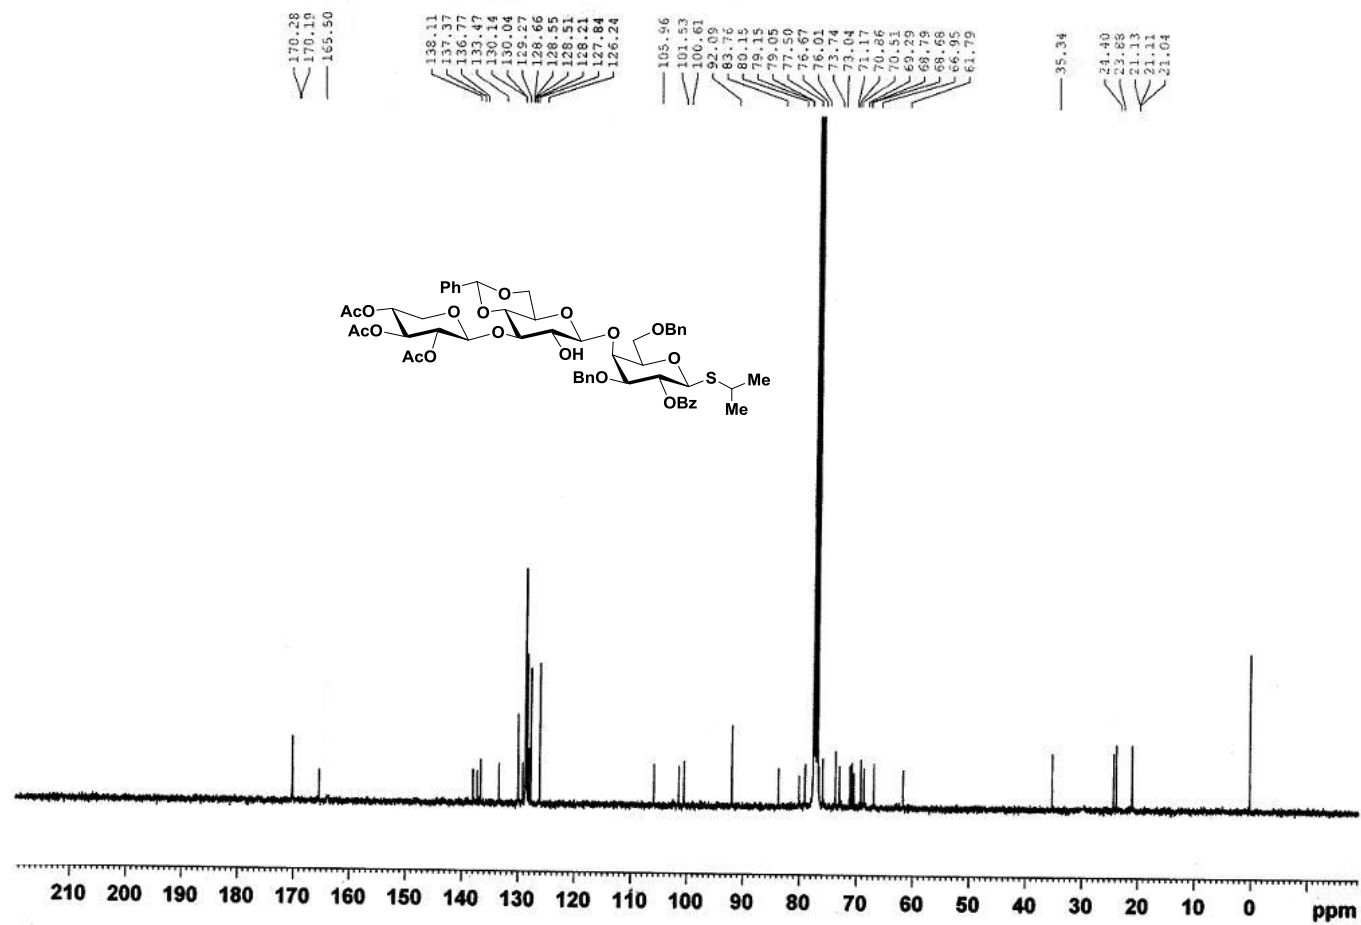

Figure 15. <sup>13</sup>C NMR (100 MHz, CDCl<sub>3</sub>) spectrum of compound 18

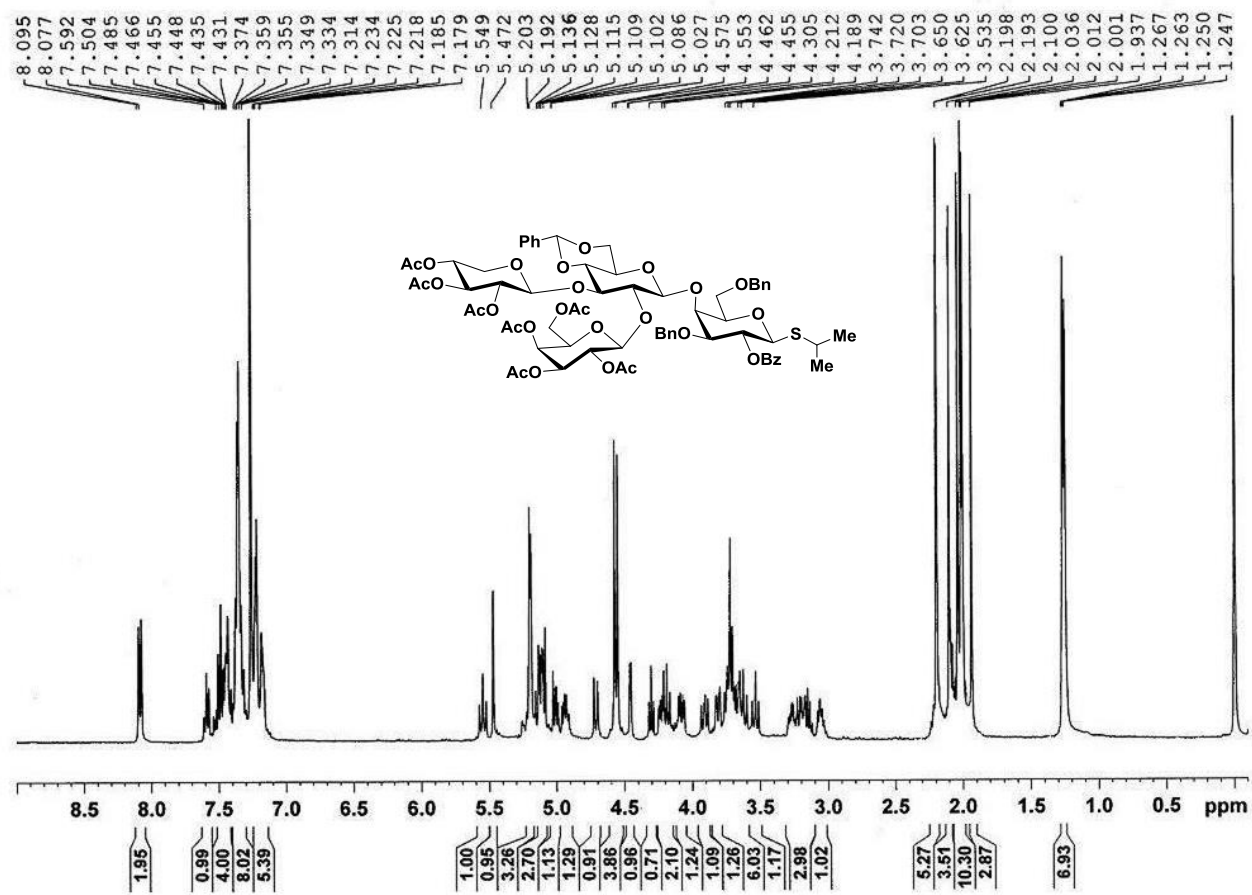

Figure 16.  $^1\text{H}$  NMR (400 MHz,  $\text{CDCl}_3$ ) spectrum of compound 2



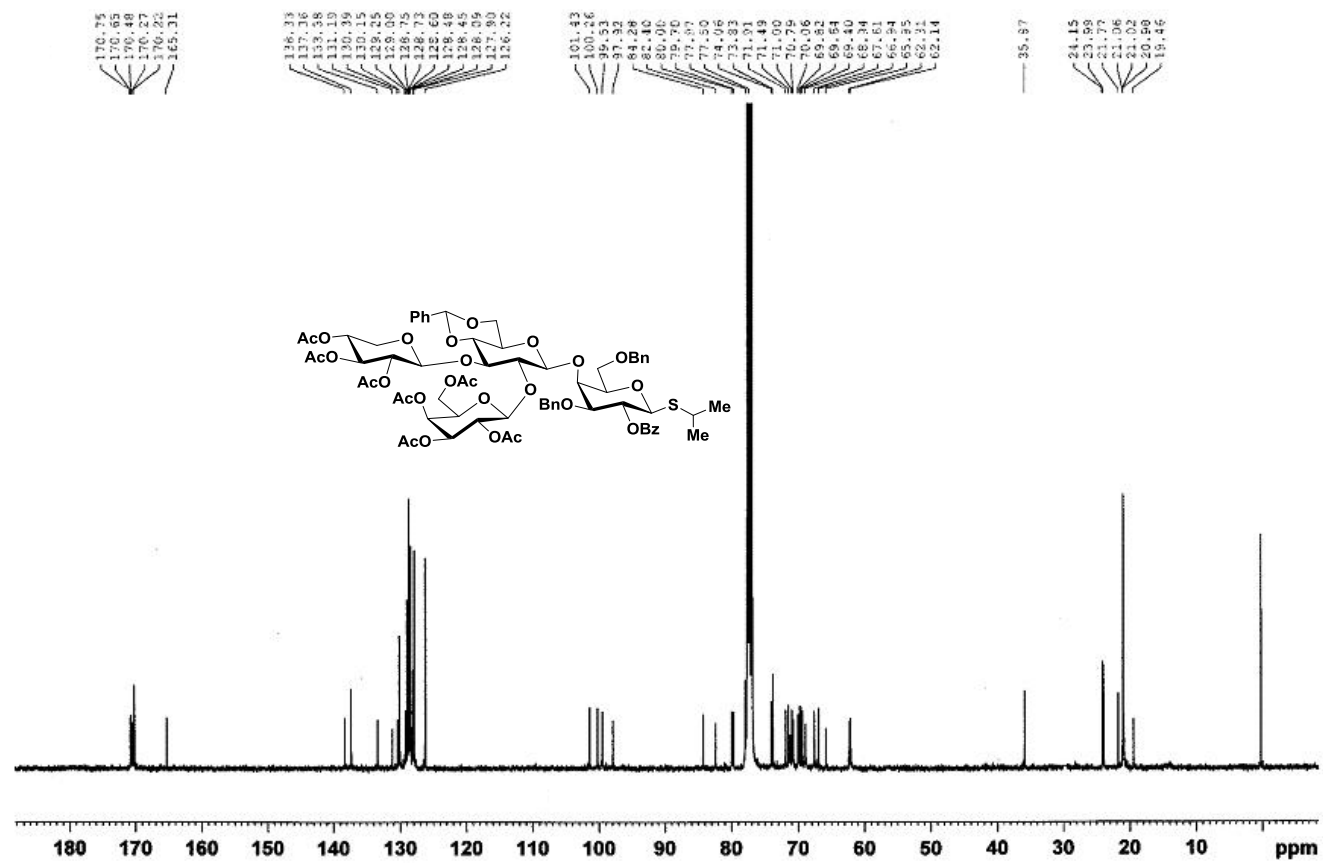

Figure 17.  $^{13}\text{C}$  NMR (100 MHz,  $\text{CDCl}_3$ ) spectrum of compound 2

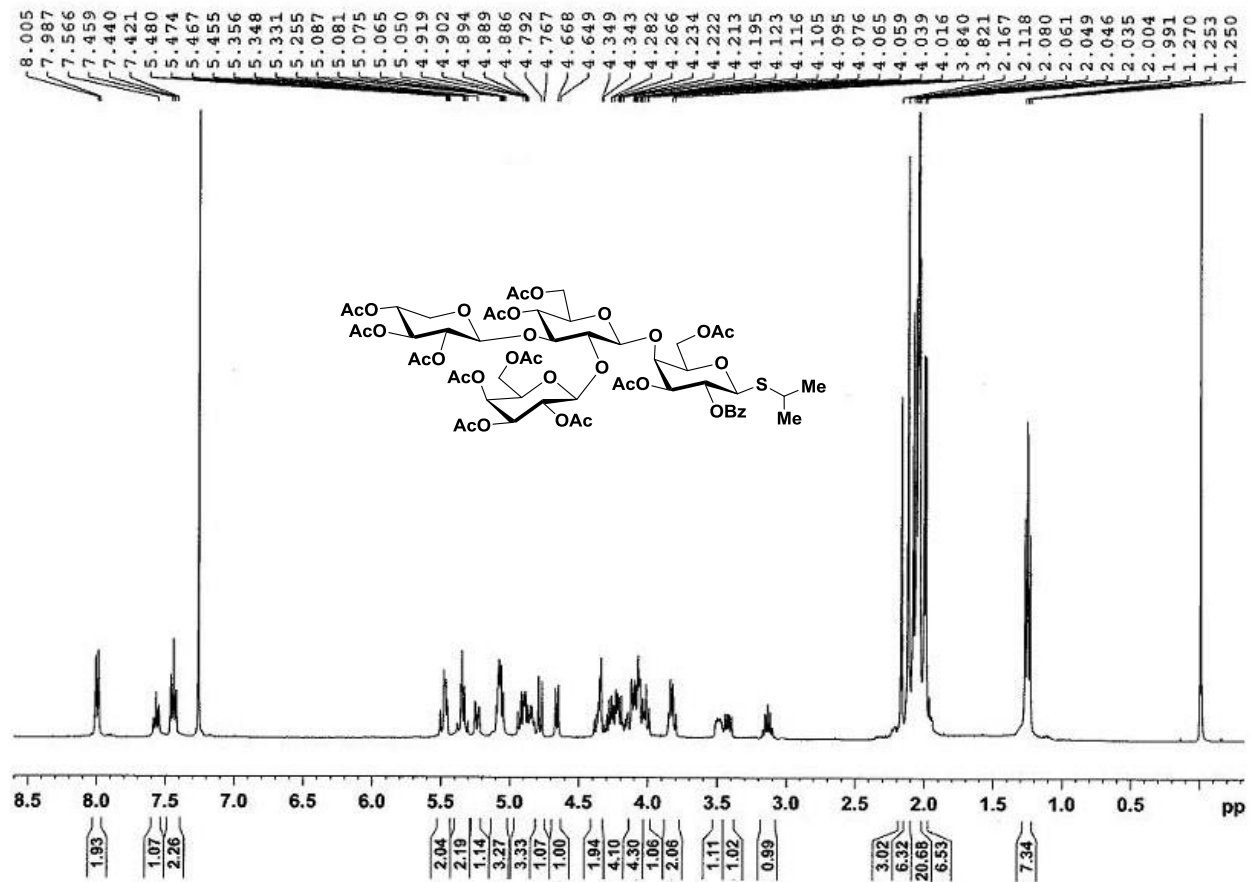

Figure 18.  $^1\text{H}$  NMR (400 MHz,  $\text{CDCl}_3$ ) spectrum of compound 20

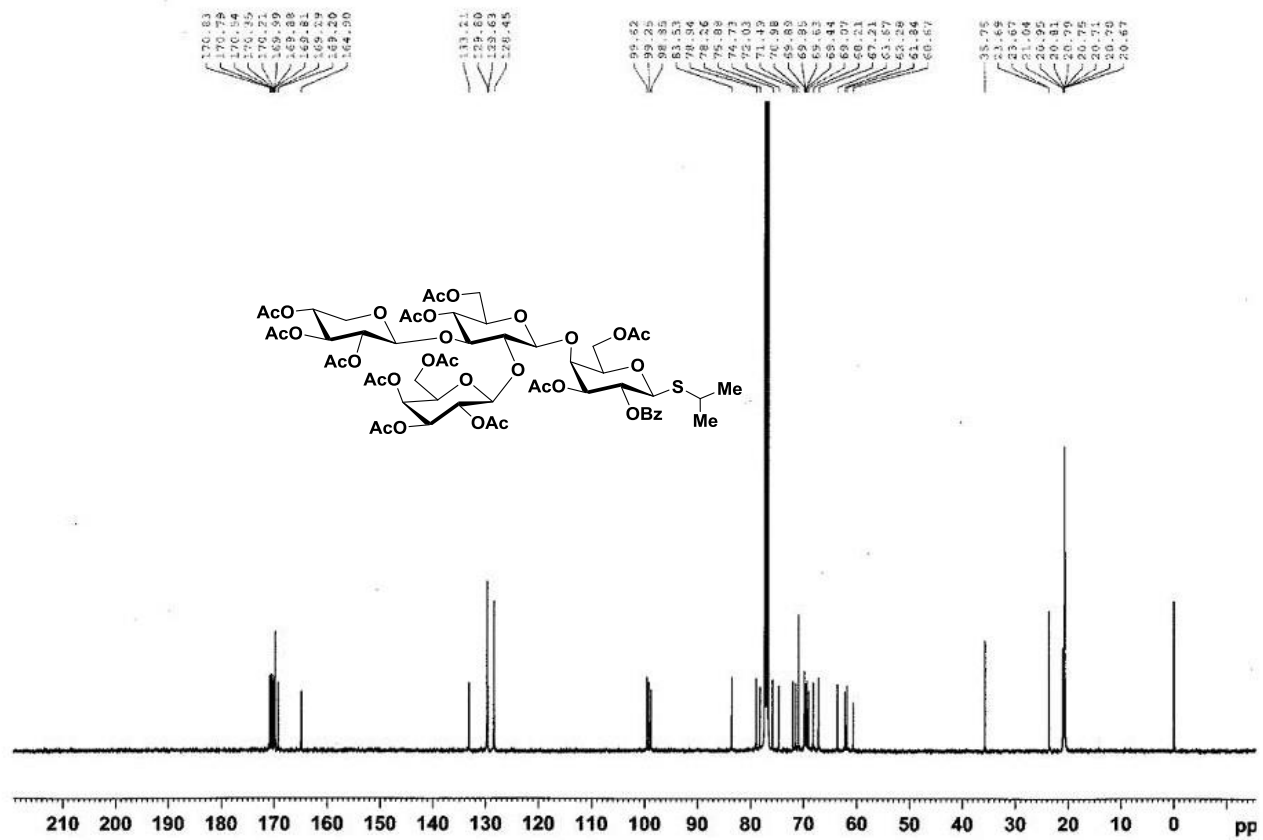

Figure 19. <sup>13</sup>C NMR (100 MHz, CDCl<sub>3</sub>) spectrum of compound 20

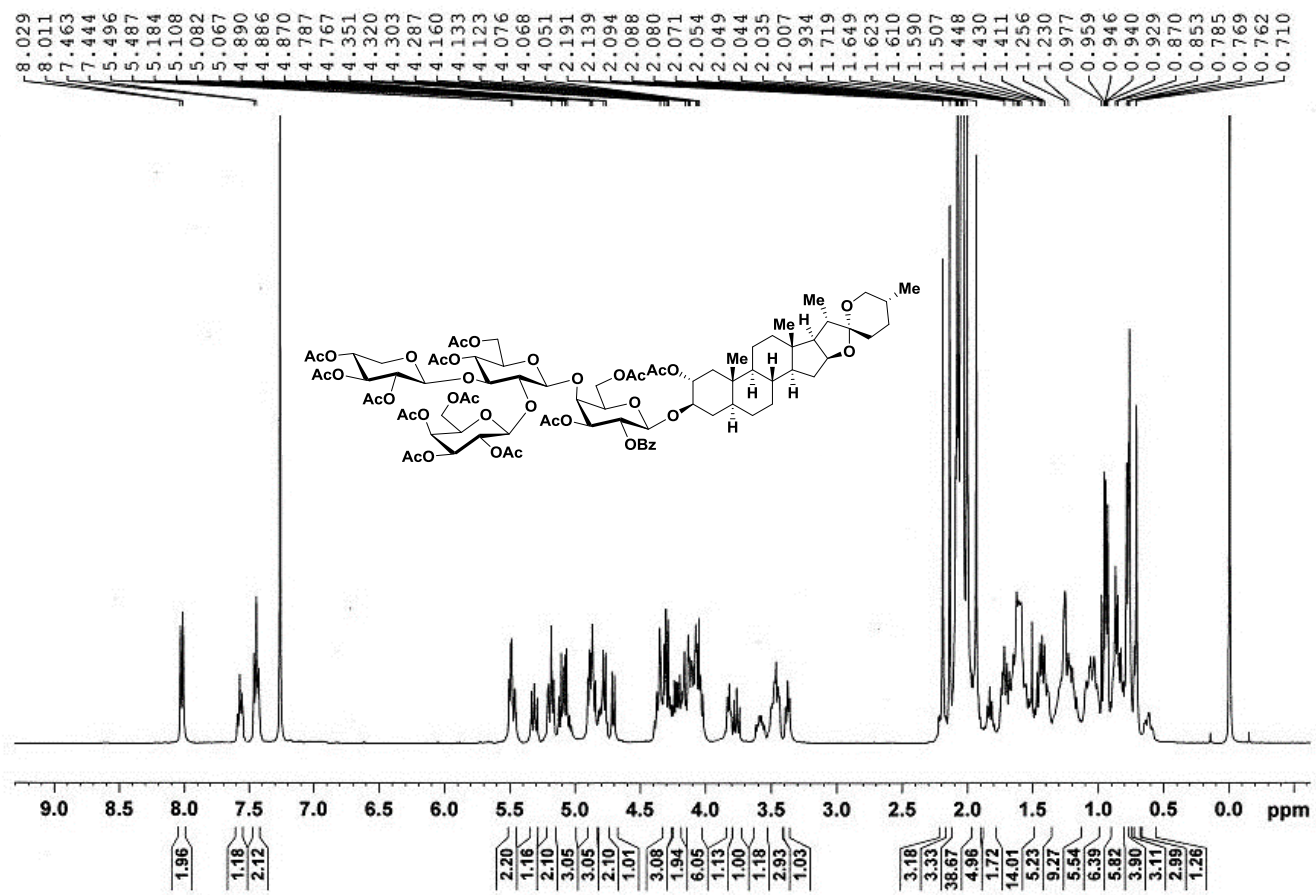

Figure 20.  $^1\text{H}$  NMR (400 MHz,  $\text{CDCl}_3$ ) spectrum of compound 21



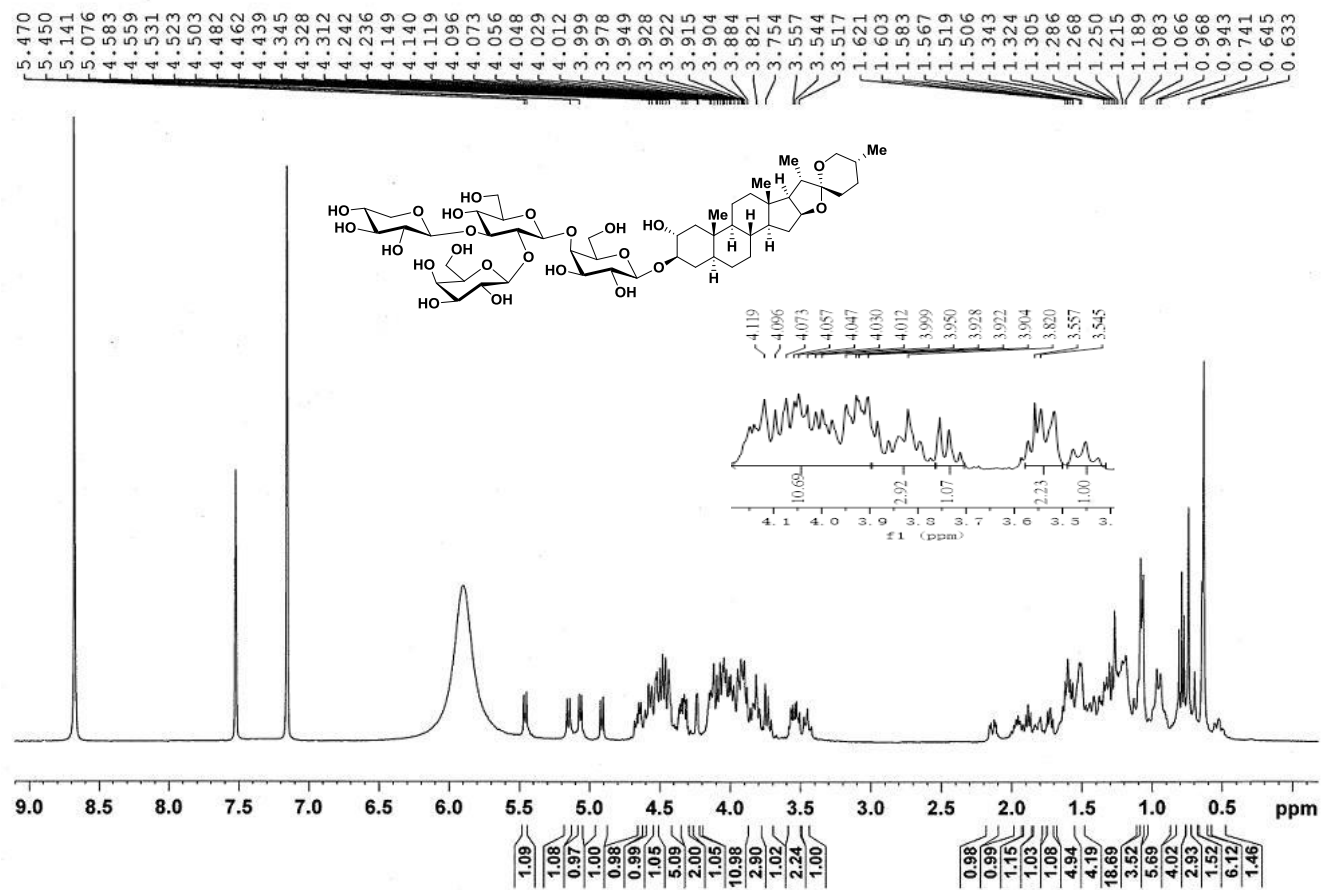

Figure 22.  $^1\text{H}$  NMR (400 MHz, Pyridine- $d_5$ ) spectrum of Gitonin (**1**)

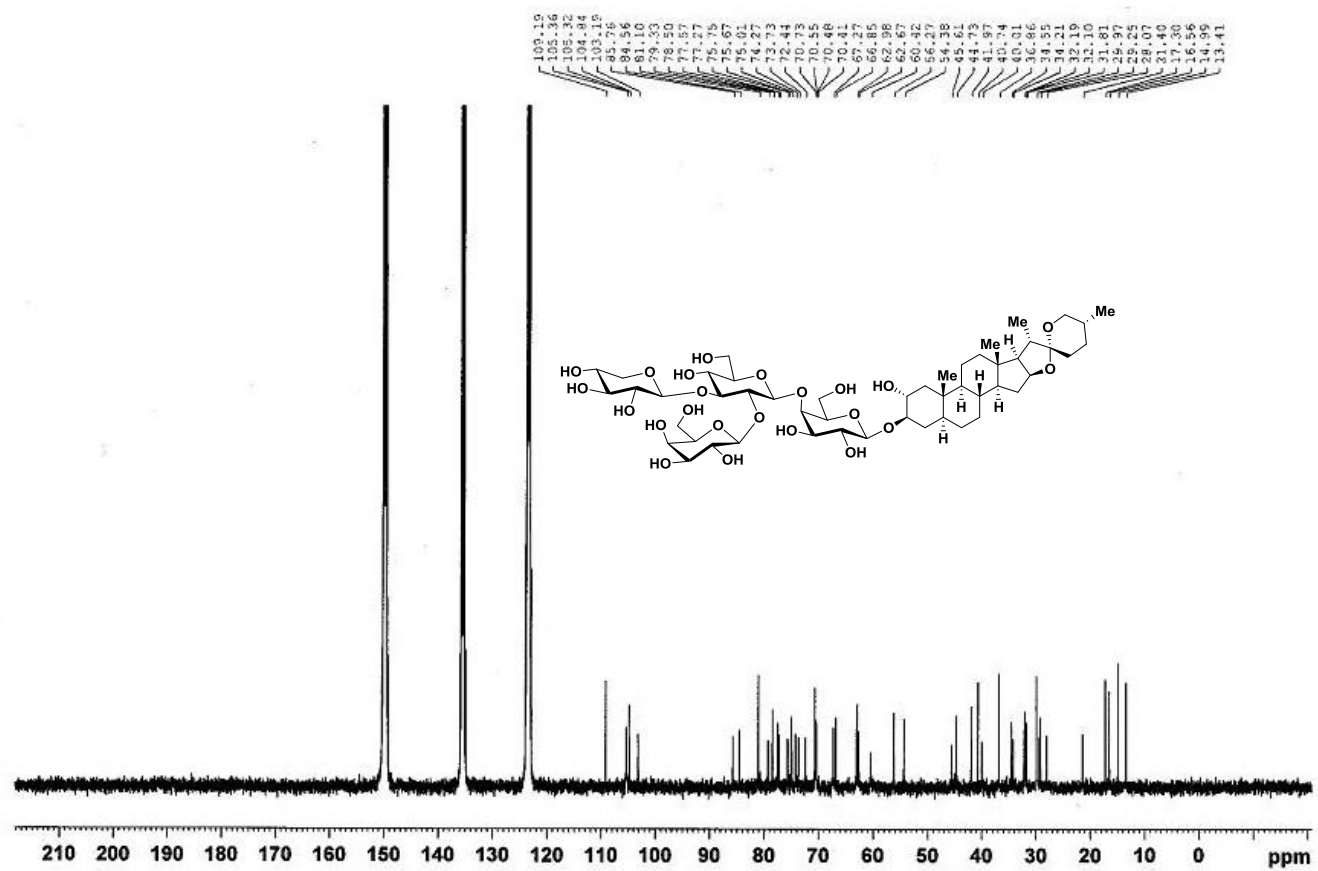

Figure 23.  $^{13}\text{C}$  NMR (100 MHz, Pyridine- $d_5$ ) spectrum of Gitonin 1

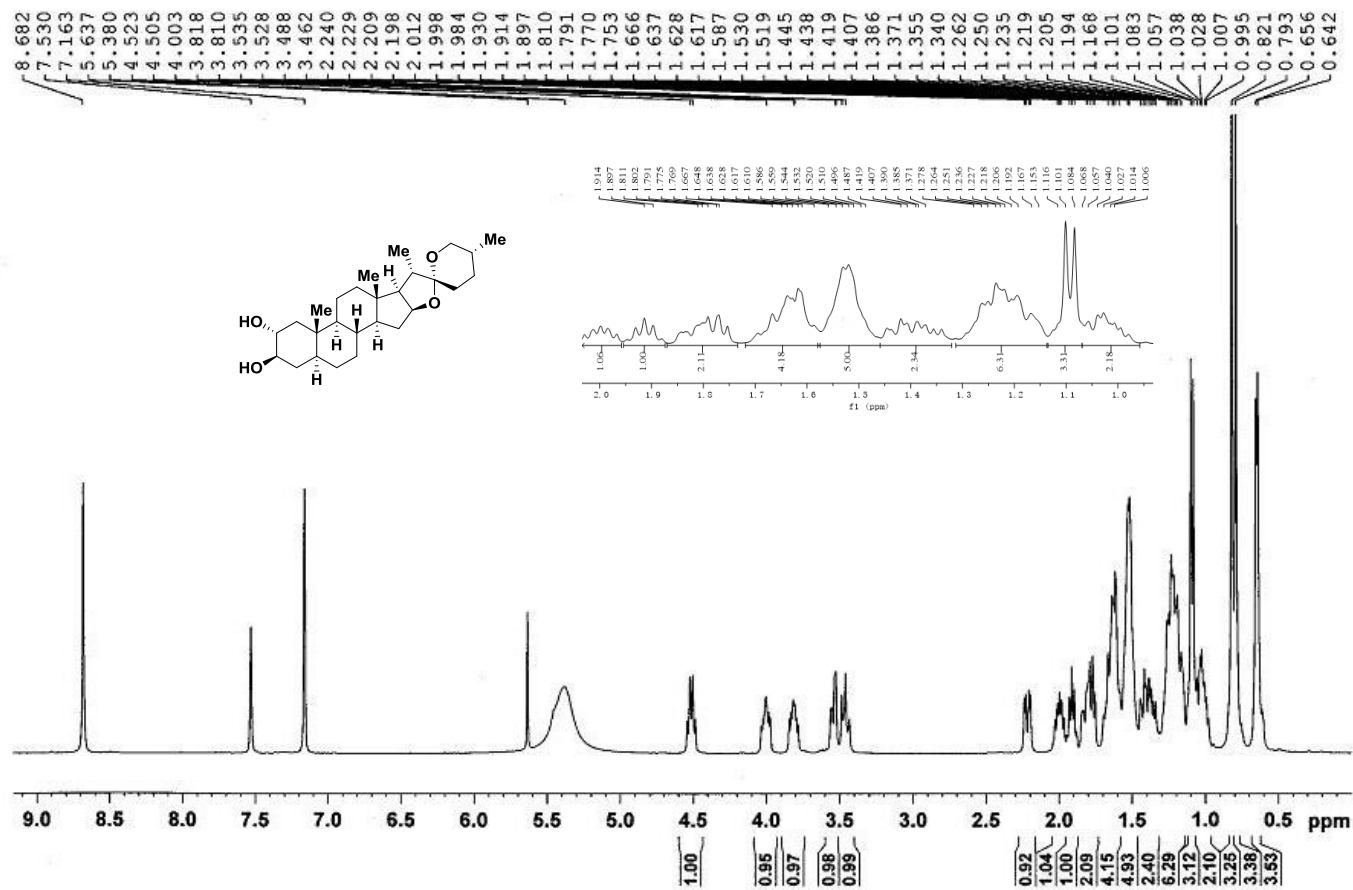

Figure 24. <sup>1</sup>H NMR (400 MHz, Pyridine-d<sub>5</sub>) spectrum of compound 22



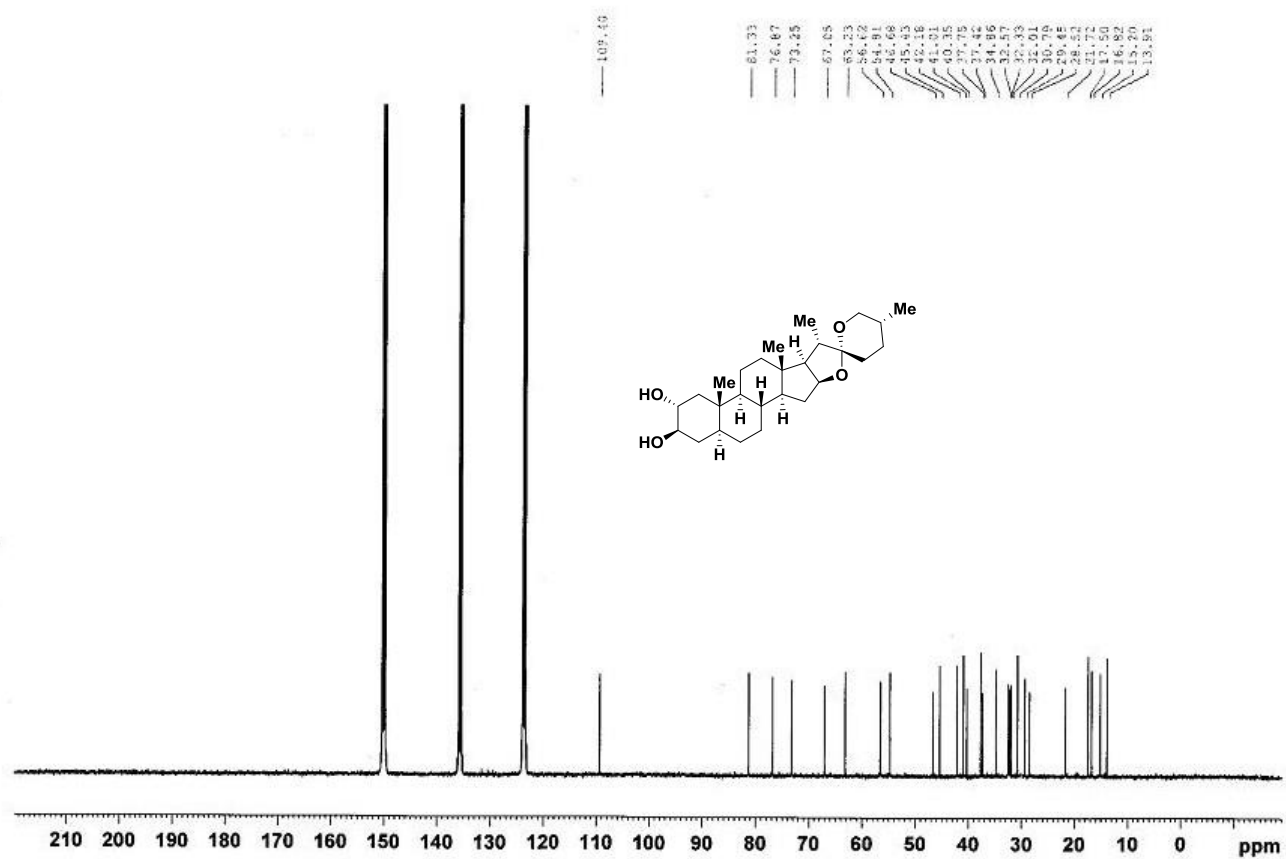

Figure 25.  $^{13}\text{C}$  NMR (100 MHz, Pyridine- $d_5$ ) spectrum of compound 22

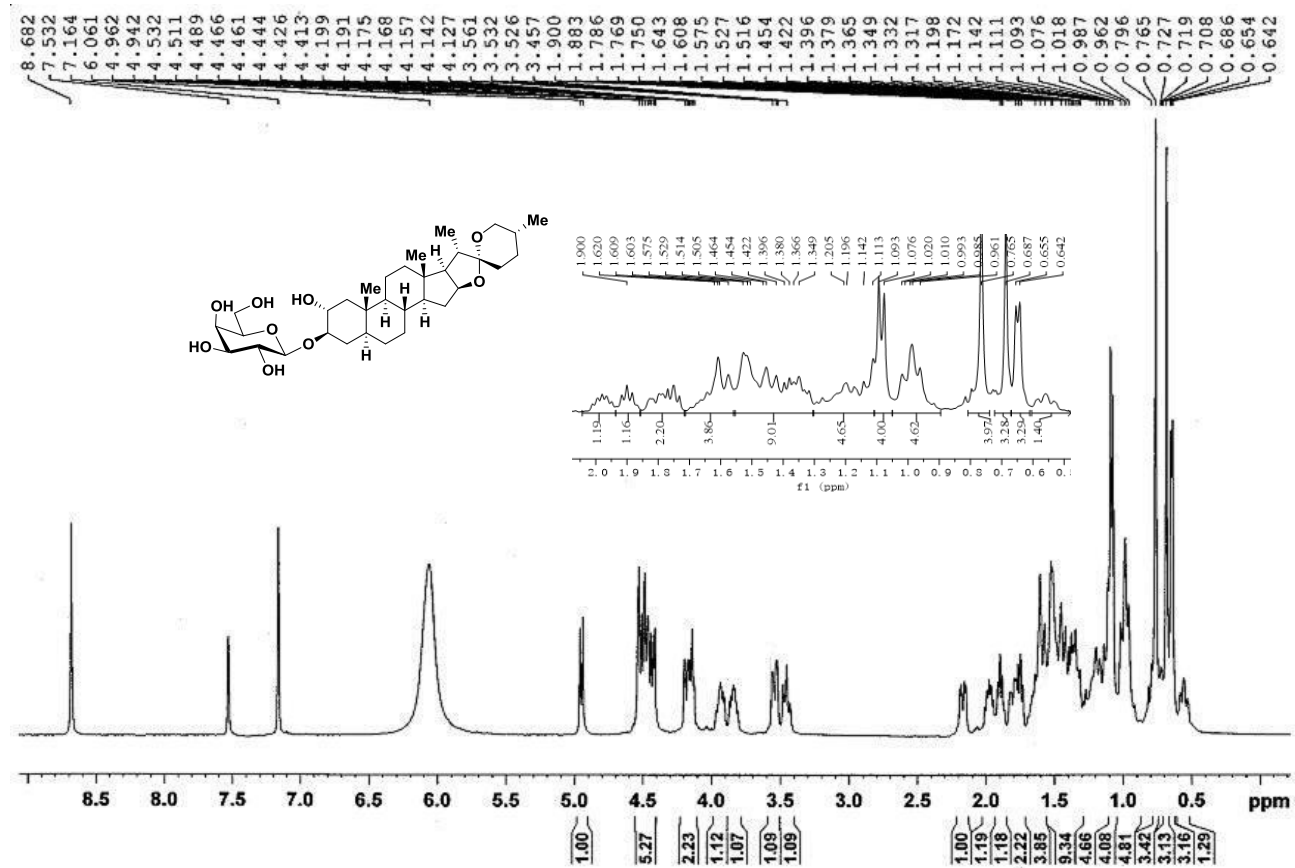

Figure 26. <sup>1</sup>H NMR (400 MHz, Pyridine-d<sub>5</sub>) spectrum of compound 23

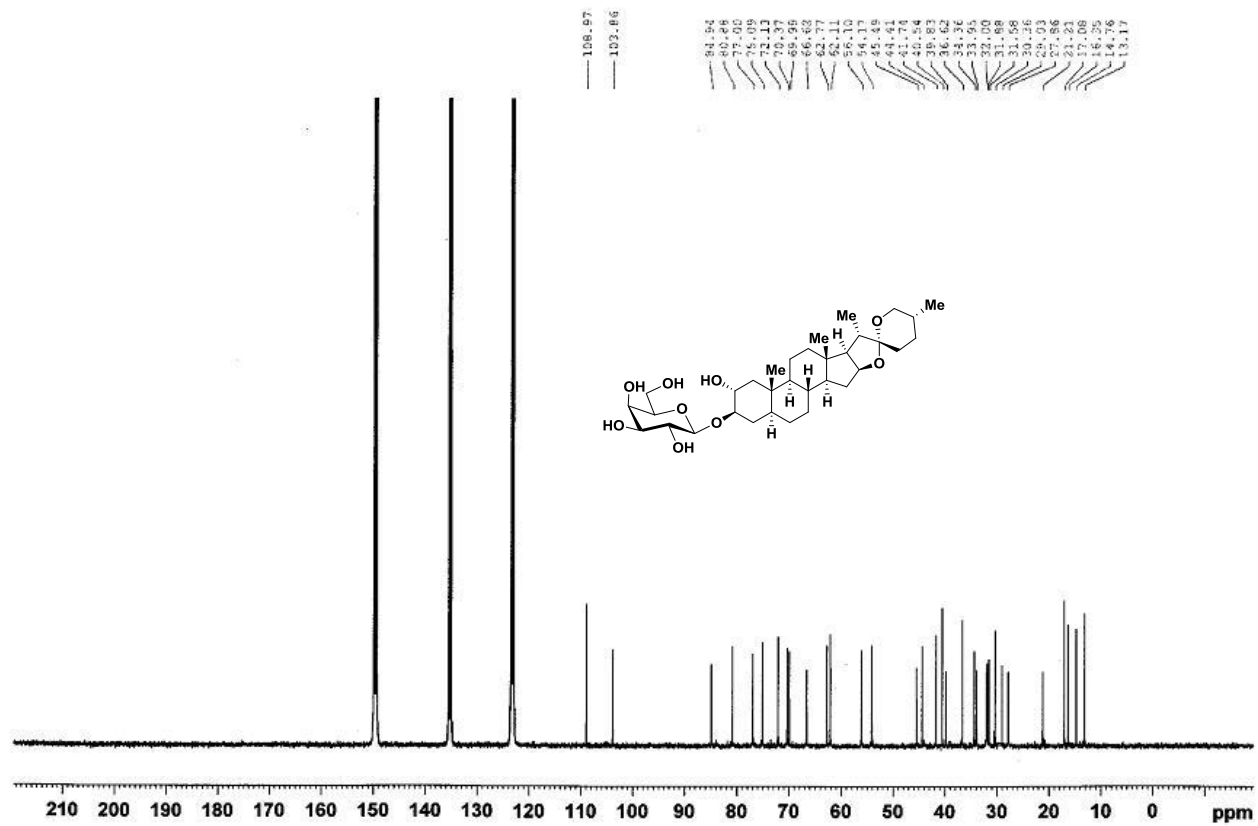

Figure 27.  $^{13}\text{C}$  NMR (100 MHz, Pyridine- $d_5$ ) spectrum of compound 23

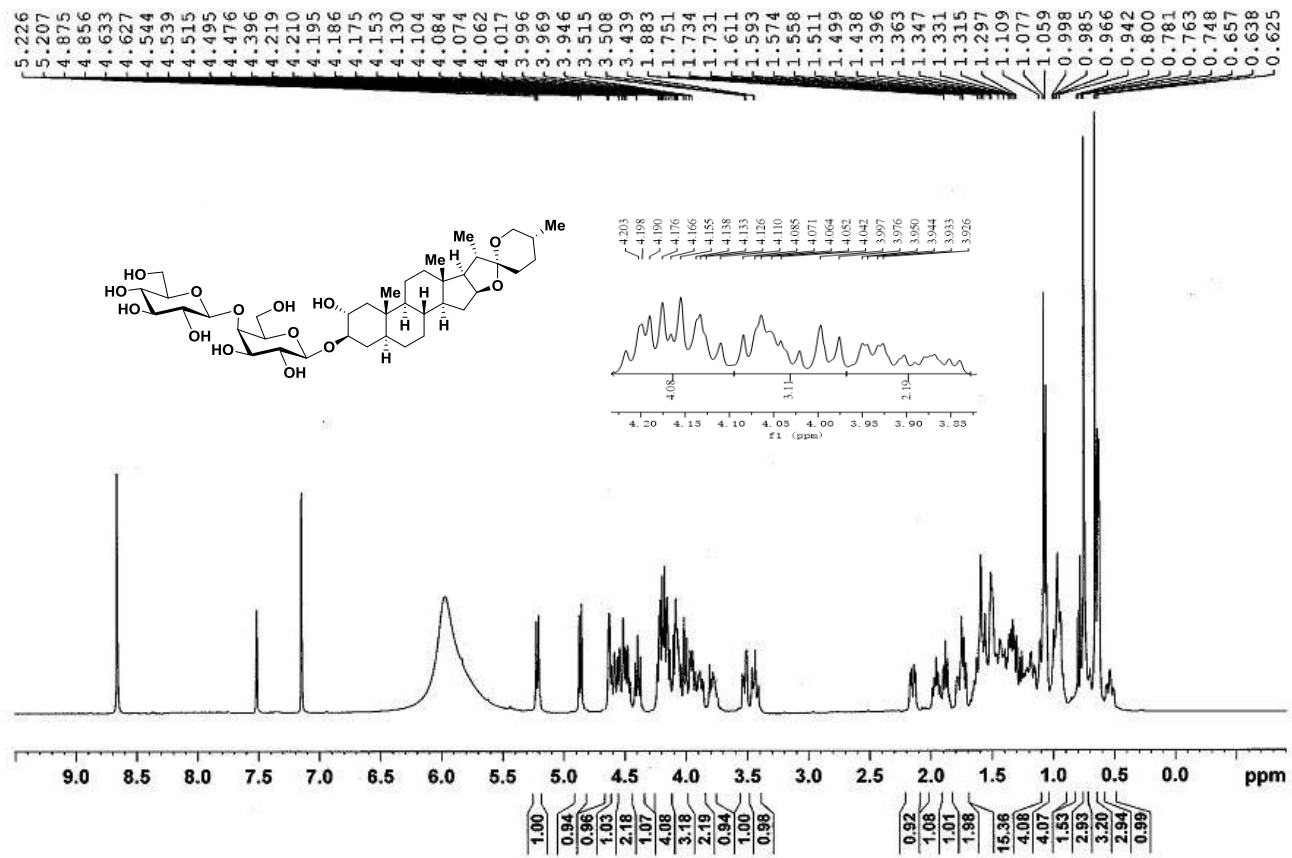

**Figure 28.** <sup>1</sup>H NMR (400 MHz, Pyridine-d<sub>5</sub>) spectrum of compound **24**

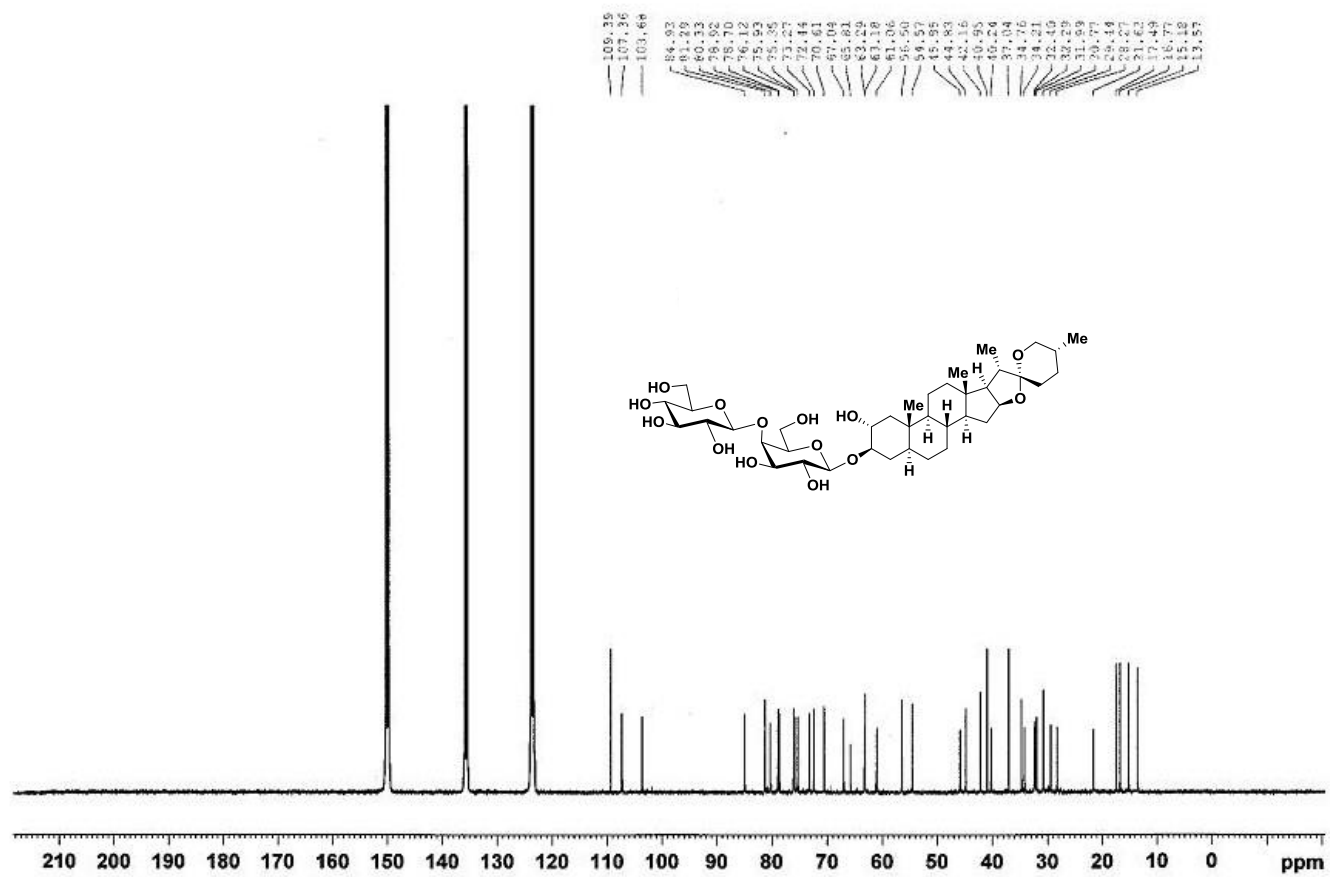

Figure 29.  $^{13}\text{C}$  NMR (100 MHz, Pyridine- $d_5$ ) spectrum of compound 24

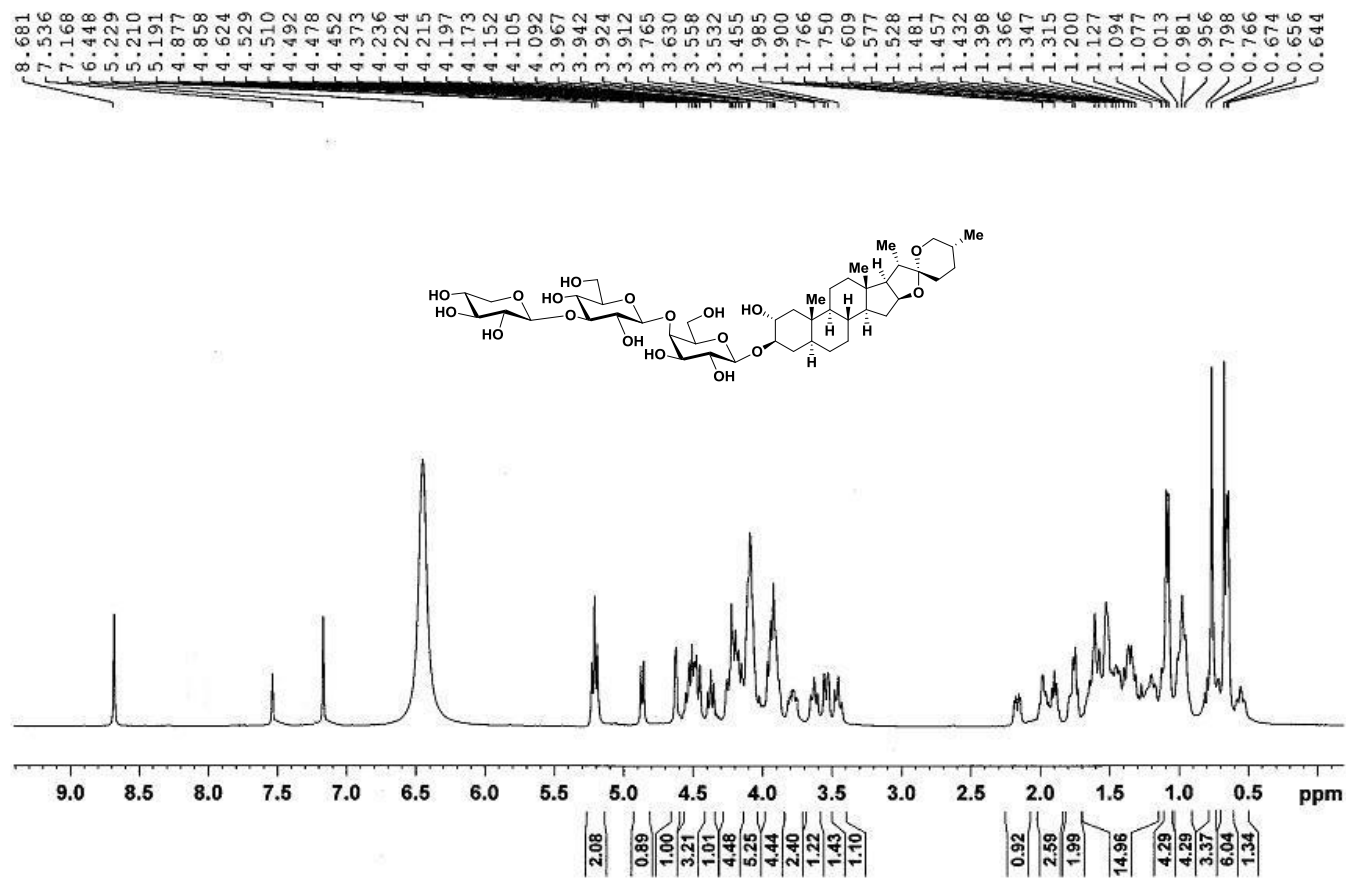

Figure 30. <sup>1</sup>H NMR (400 MHz, Pyridine-d<sub>5</sub>) spectrum of compound 25

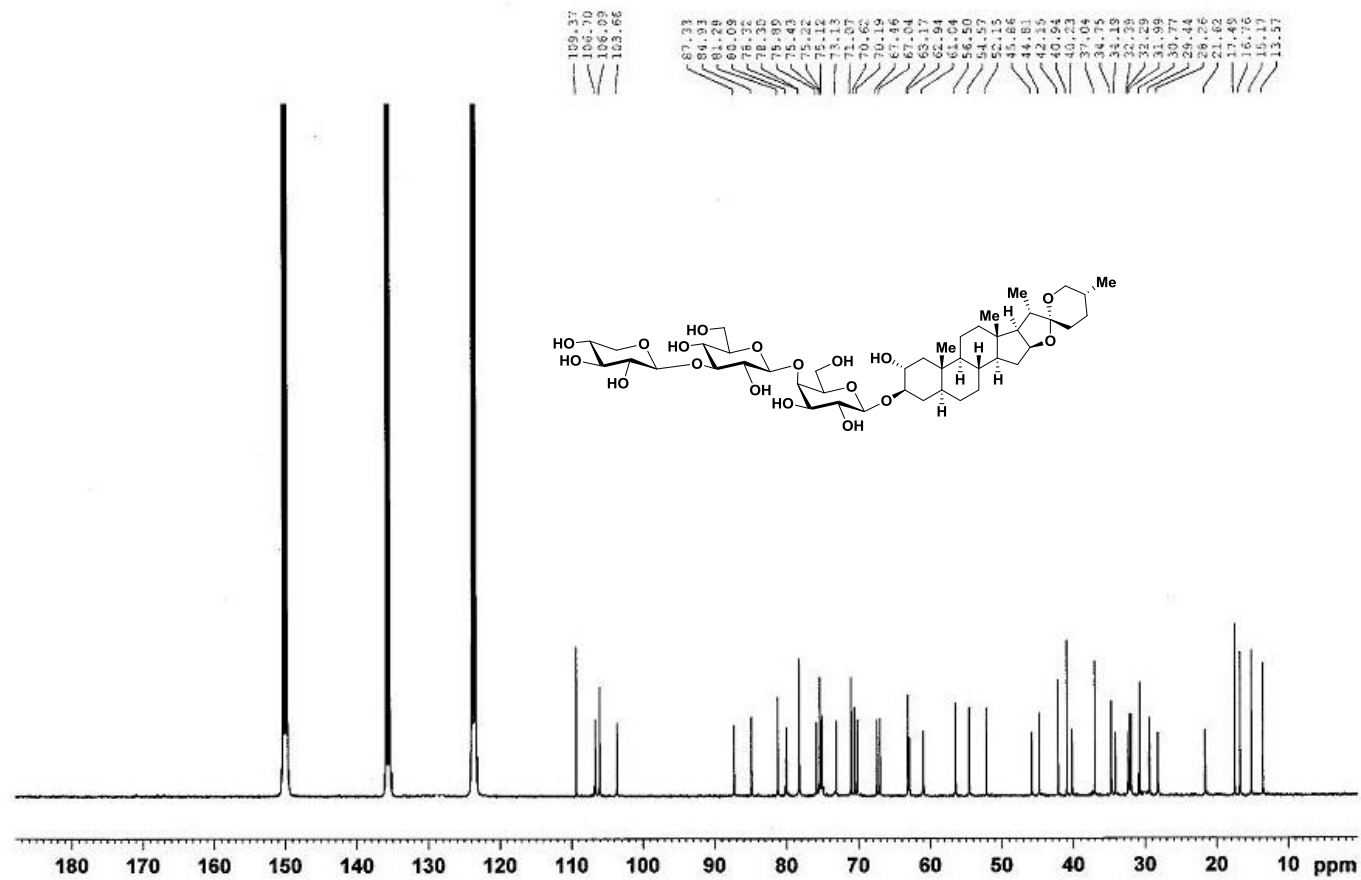

Figure 31.  $^{13}\text{C}$  NMR (100 MHz, Pyridine- $d_5$ ) spectrum of compound **25**

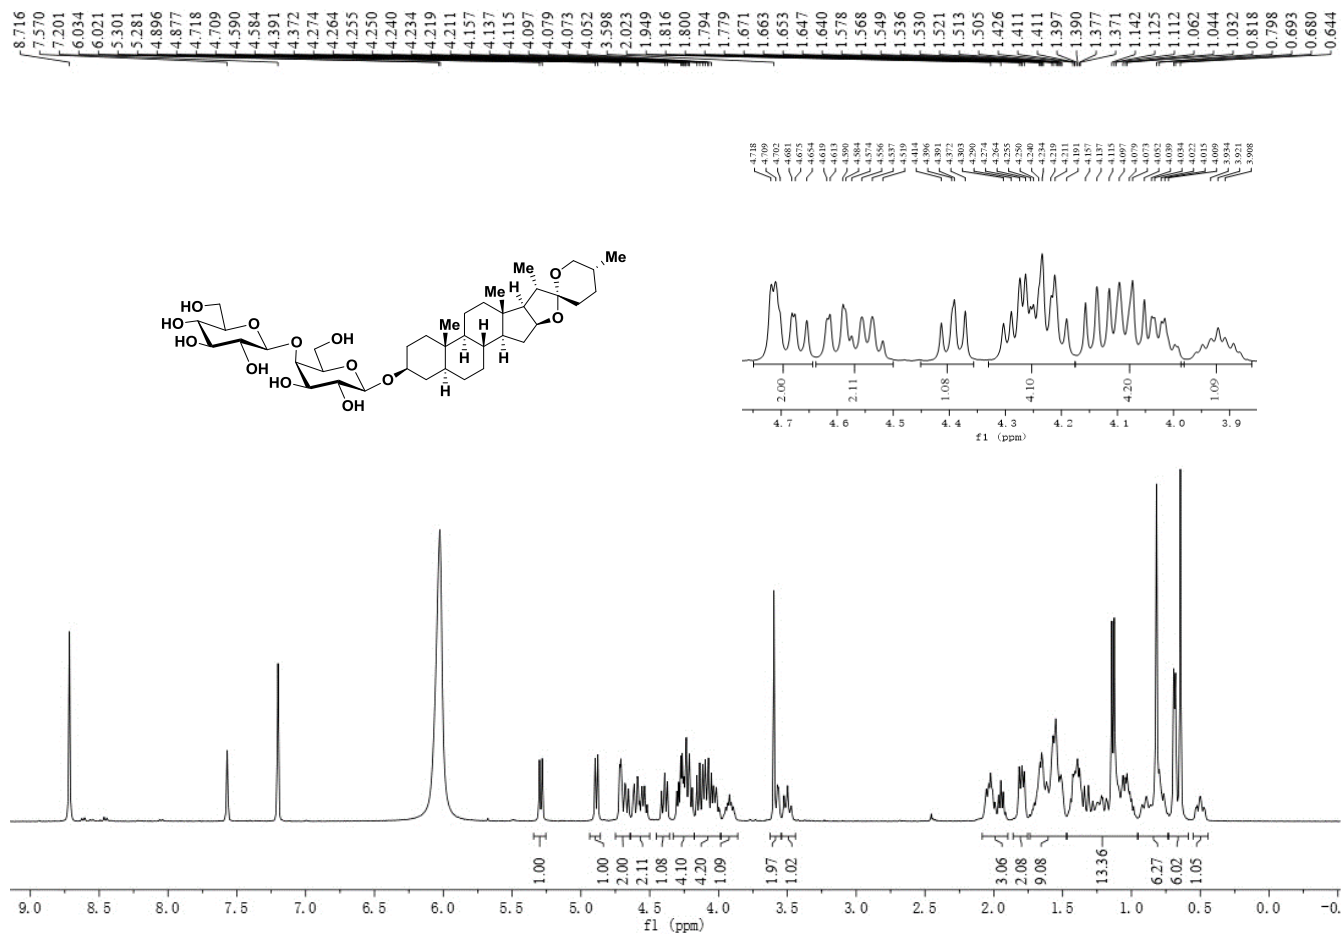

Figure 32.  $^1\text{H}$  NMR (400 MHz, Pyridine- $d_5$ ) spectrum of compound 26



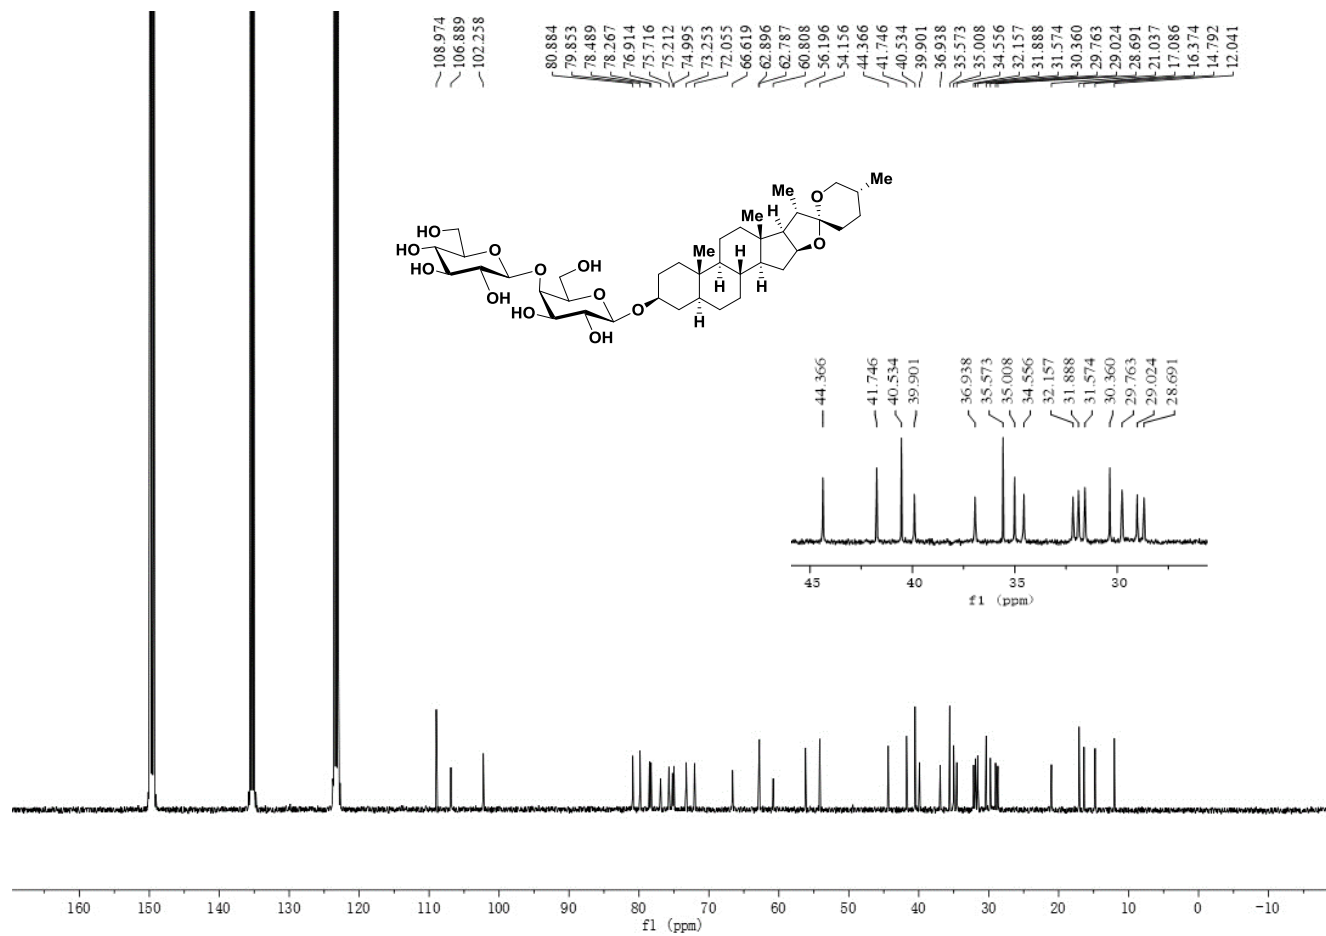

Figure 33.  $^{13}\text{C}$  NMR (100 MHz, Pyridine- $d_5$ ) spectrum of compound 26

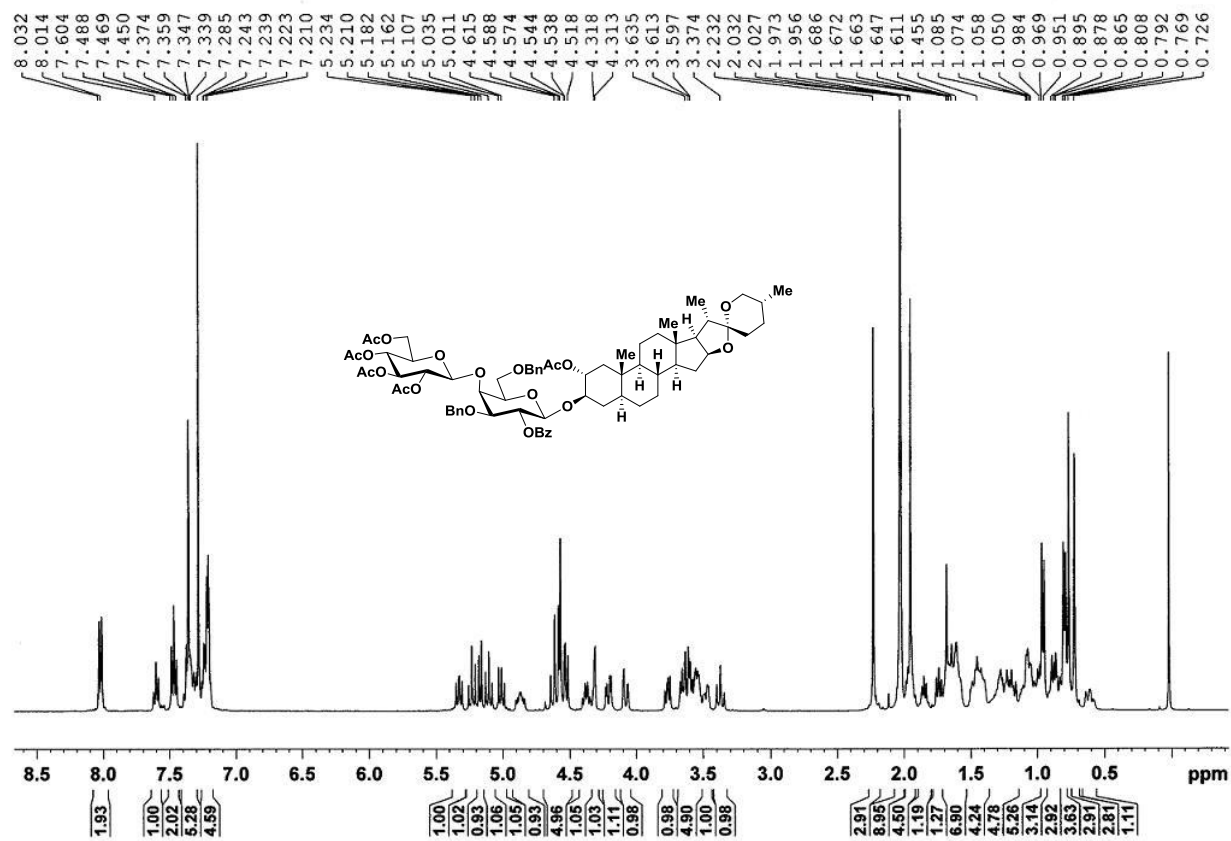

**Figure 36.**  $^1\text{H}$  NMR (400 MHz,  $\text{CDCl}_3$ ) spectrum of compound 28

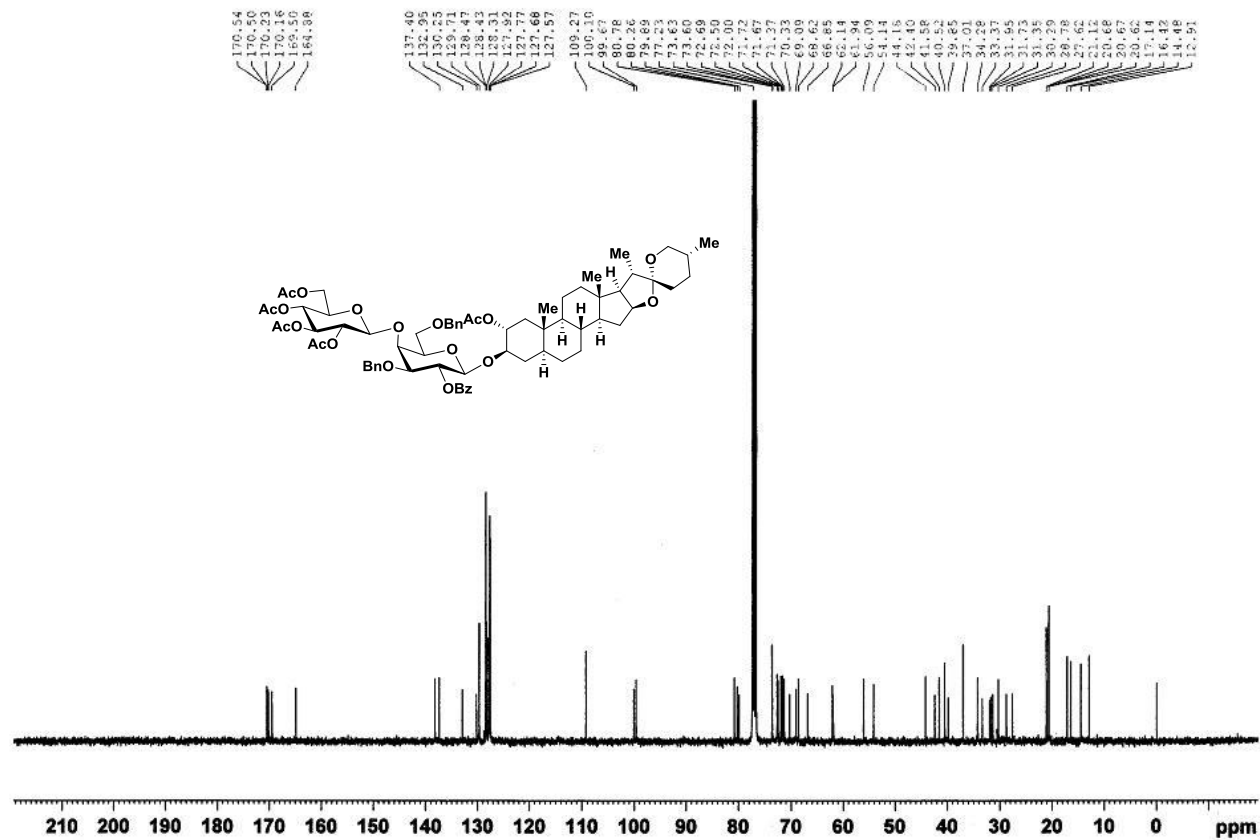

Figure 37.  $^{13}\text{C}$  NMR (100 MHz,  $\text{CDCl}_3$ ) spectrum of compound 28

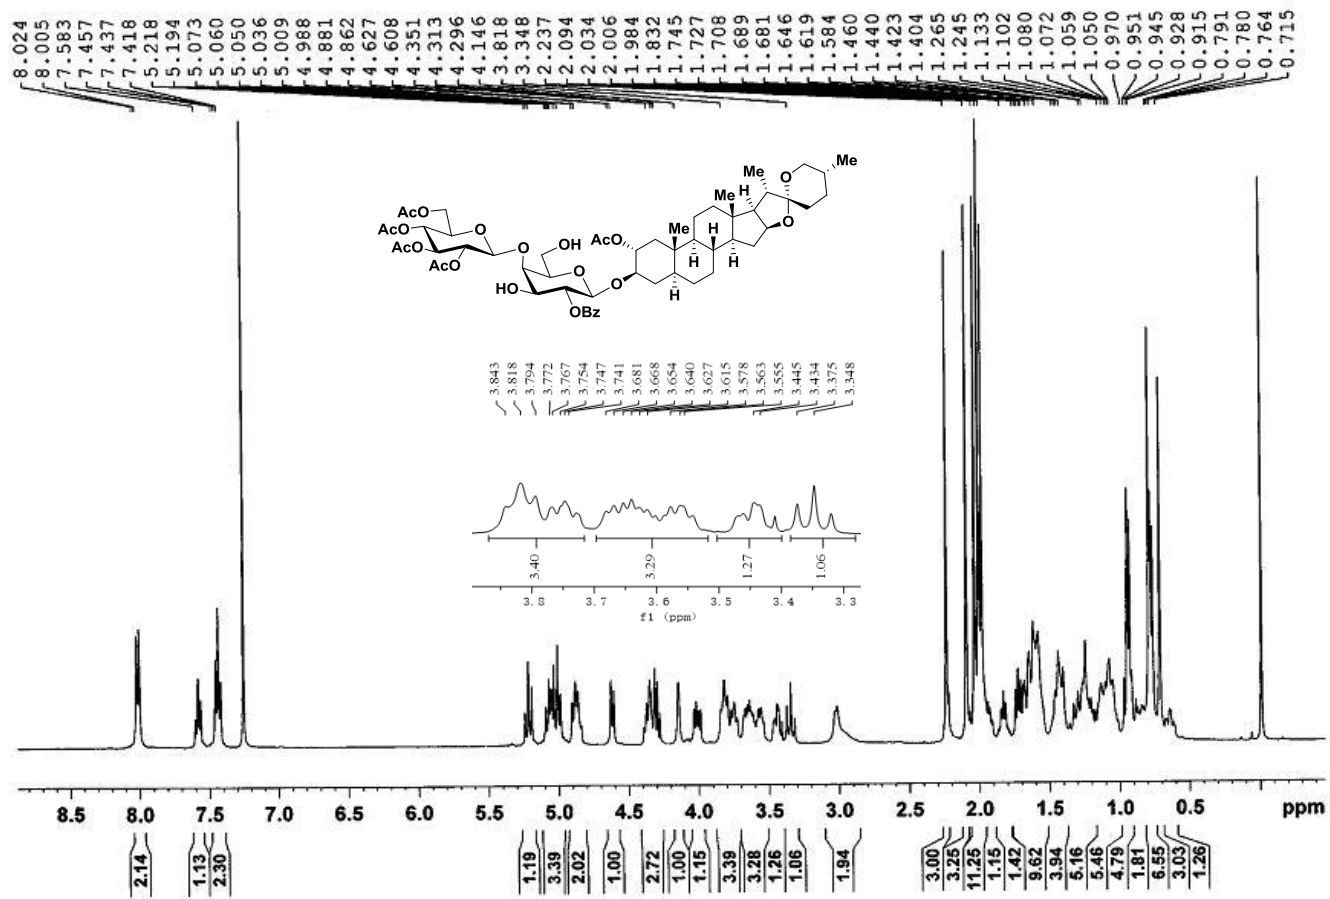

Figure 38.  $^1\text{H}$  NMR (400 MHz,  $\text{CDCl}_3$ ) spectrum of compound 29

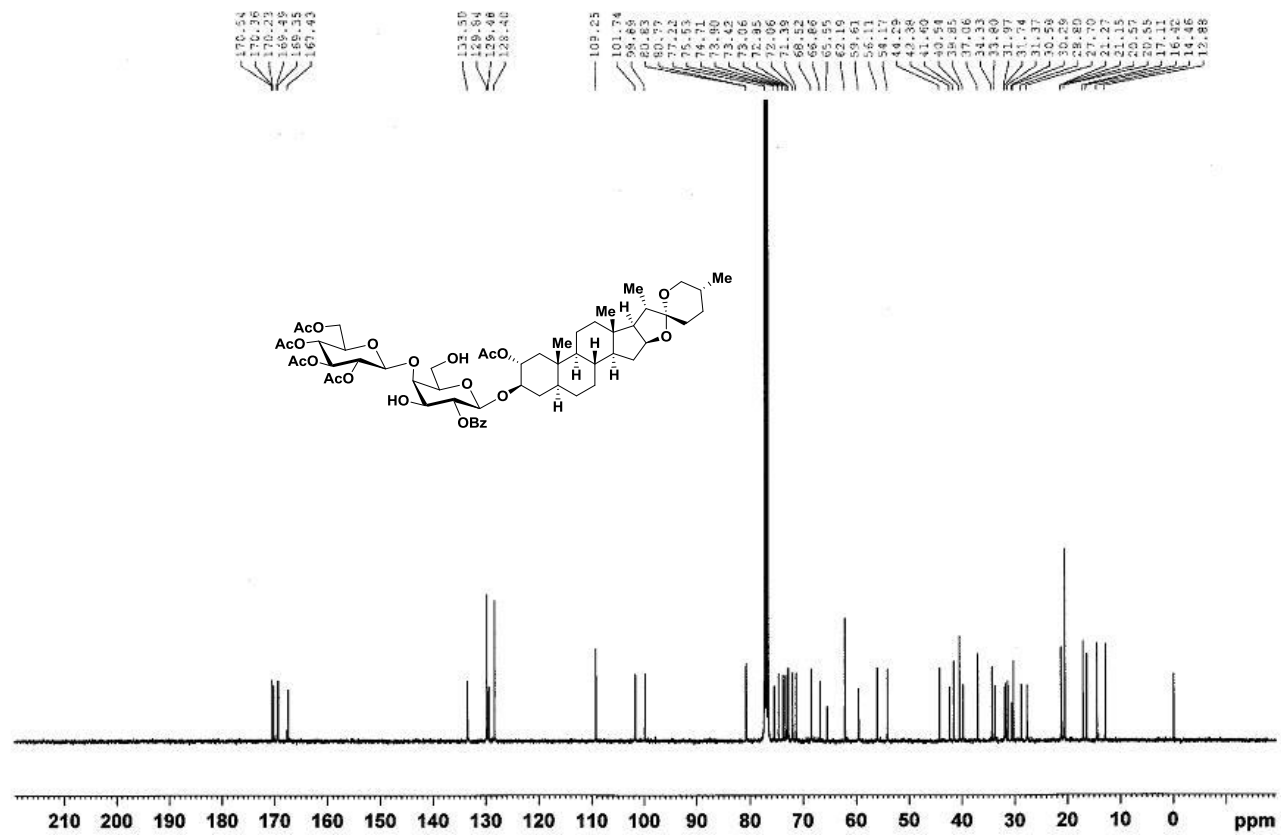

Figure 39.  $^{13}\text{C}$  NMR (100 MHz,  $\text{CDCl}_3$ ) spectrum of compound 29

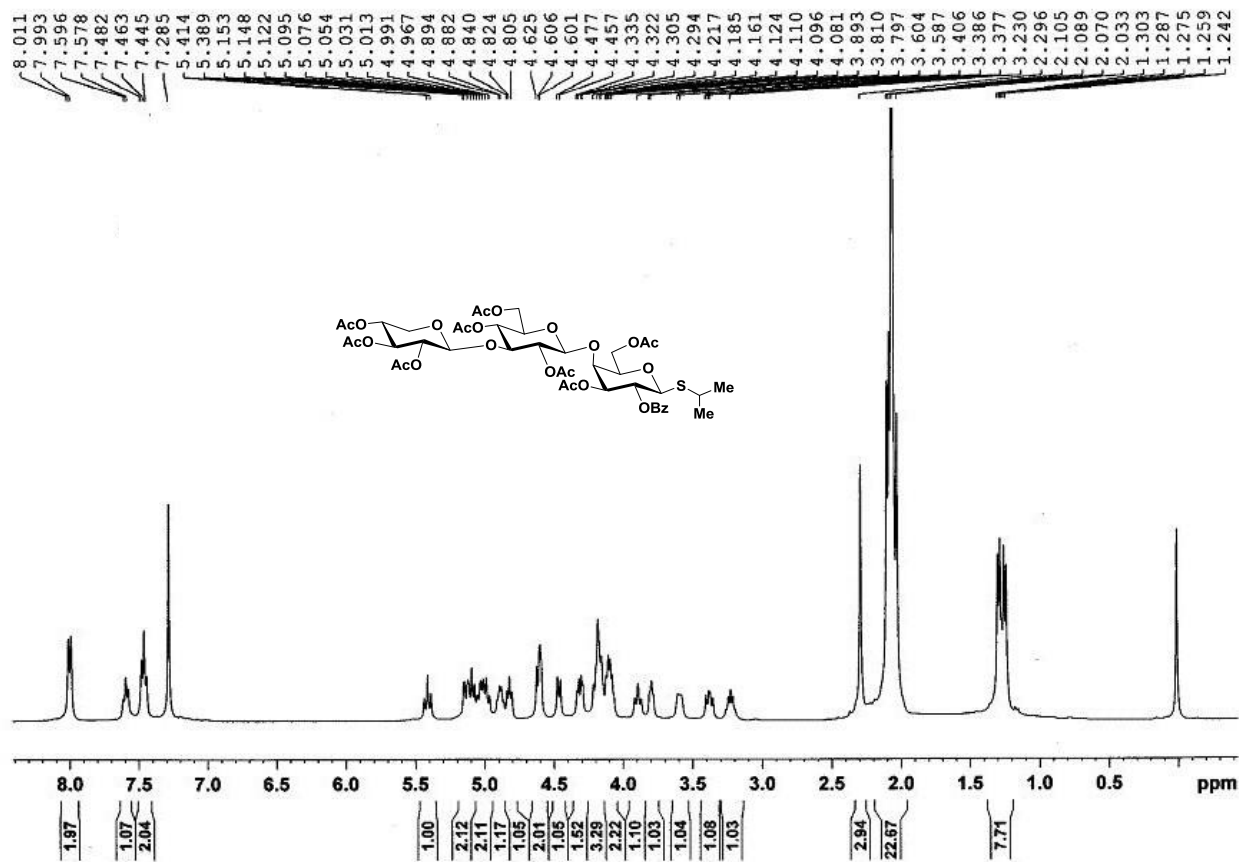

Figure 40.  $^1\text{H NMR}$  (400 MHz,  $\text{CDCl}_3$ ) spectrum of compound 30

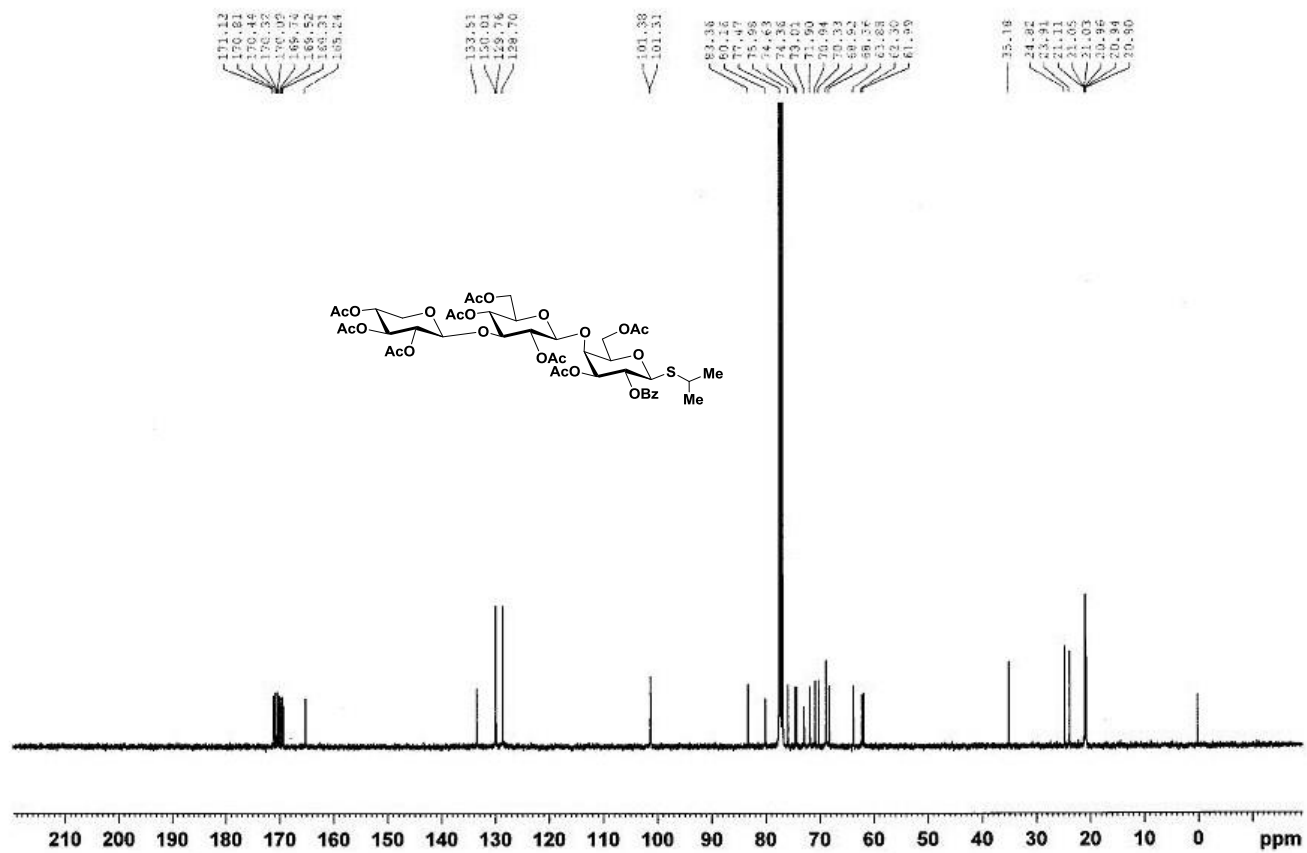

**Figure 41.**  $^{13}\text{C}$  NMR (100 MHz,  $\text{CDCl}_3$ ) spectrum of compound 30

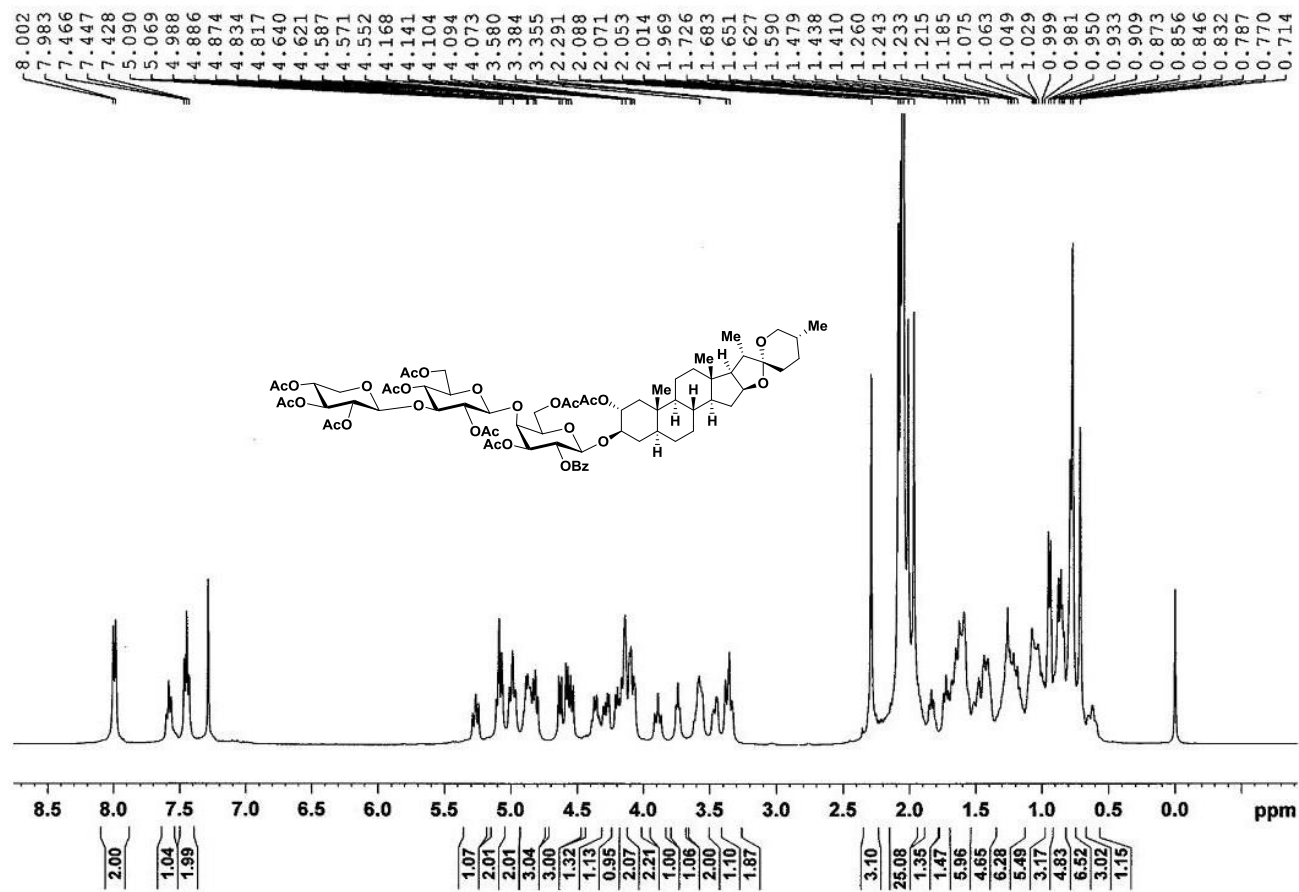

Figure 42.  $^1\text{H}$  NMR (400 MHz,  $\text{CDCl}_3$ ) spectrum of compound 31



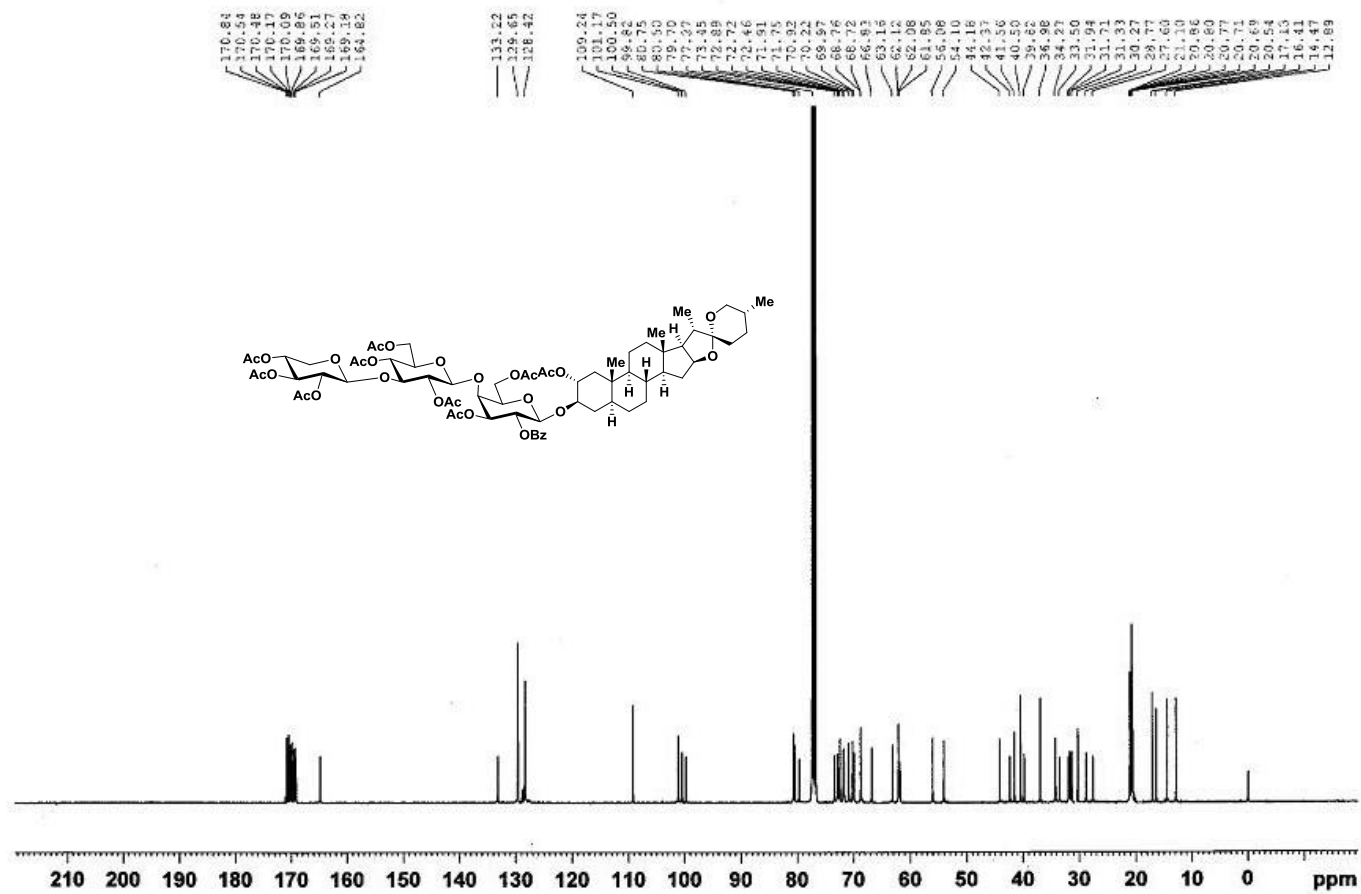

Figure 43. <sup>13</sup>C NMR (100 MHz, CDCl<sub>3</sub>) spectrum of compound 31

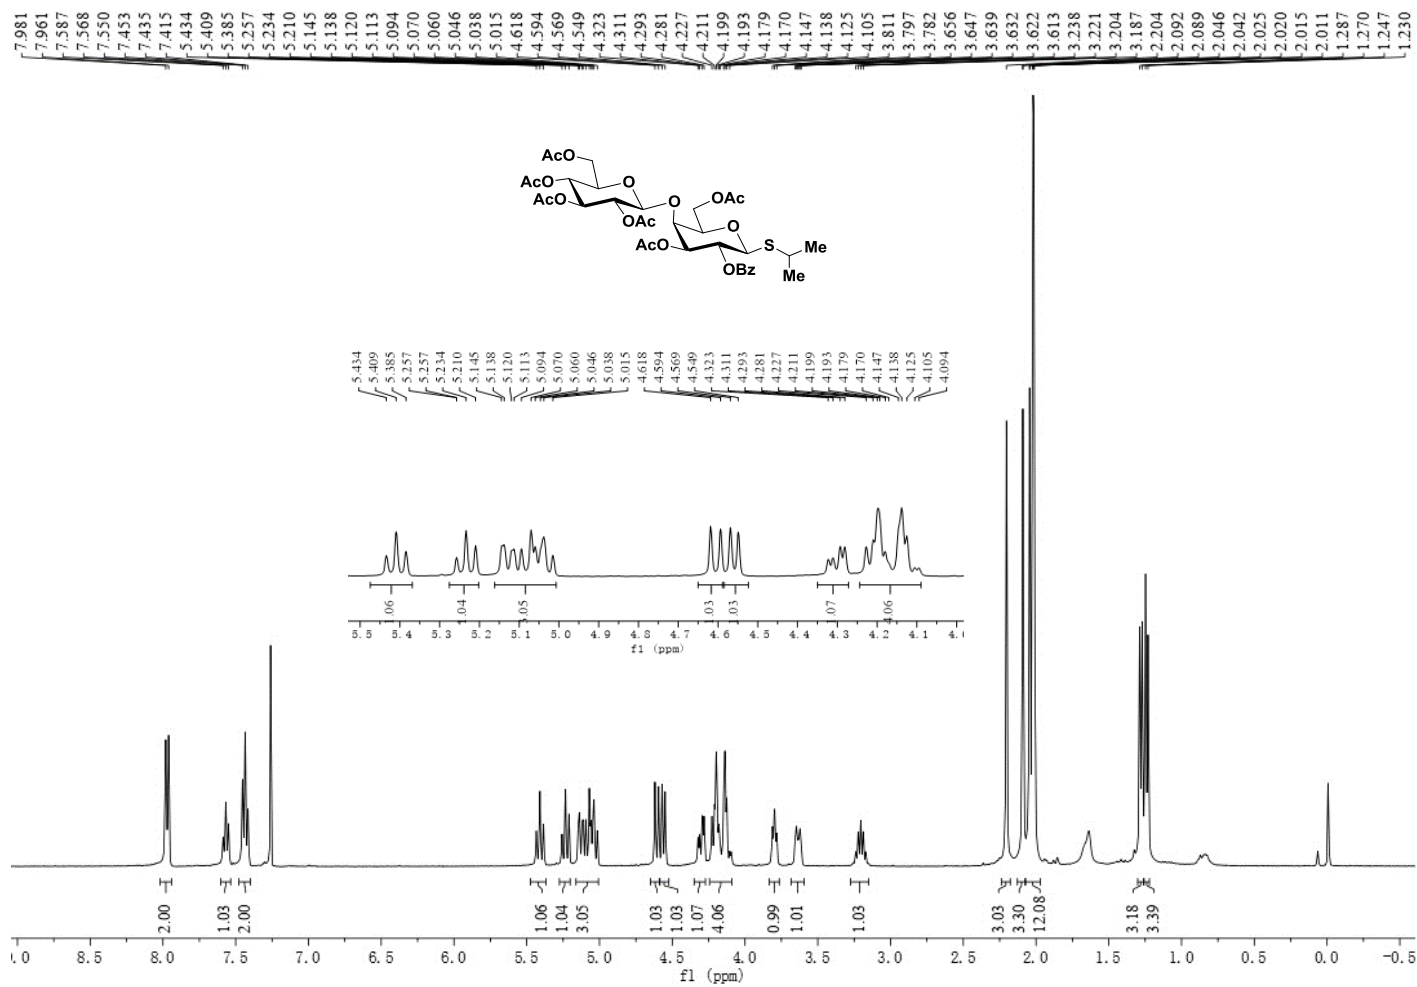

**Figure 44.** <sup>1</sup>H NMR (400 MHz, CDCl<sub>3</sub>) spectrum of compound **32**

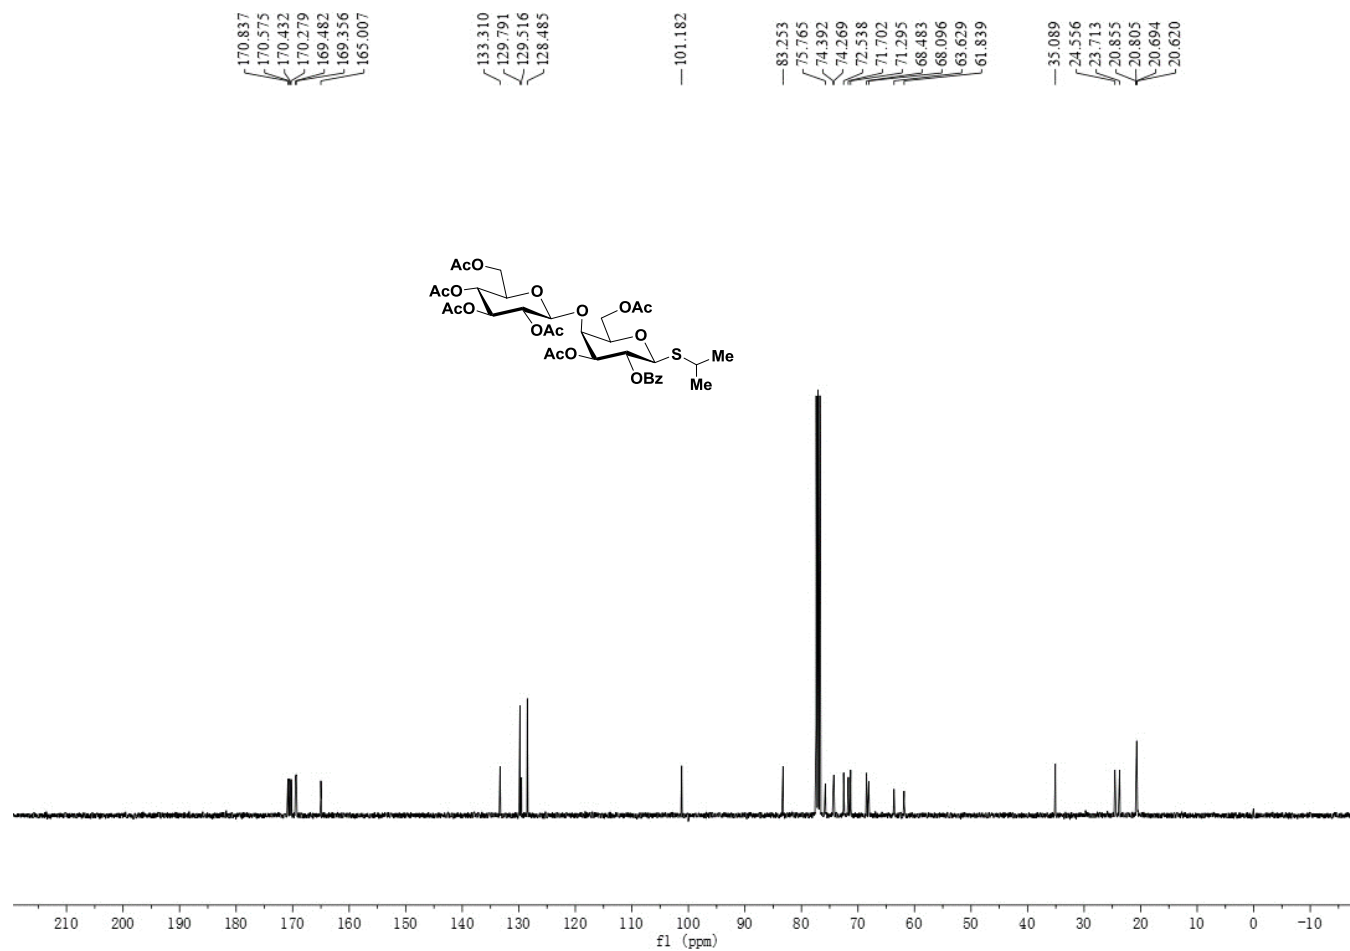

Figure 45. <sup>13</sup>C NMR (100 MHz, CDCl<sub>3</sub>) spectrum of compound 32

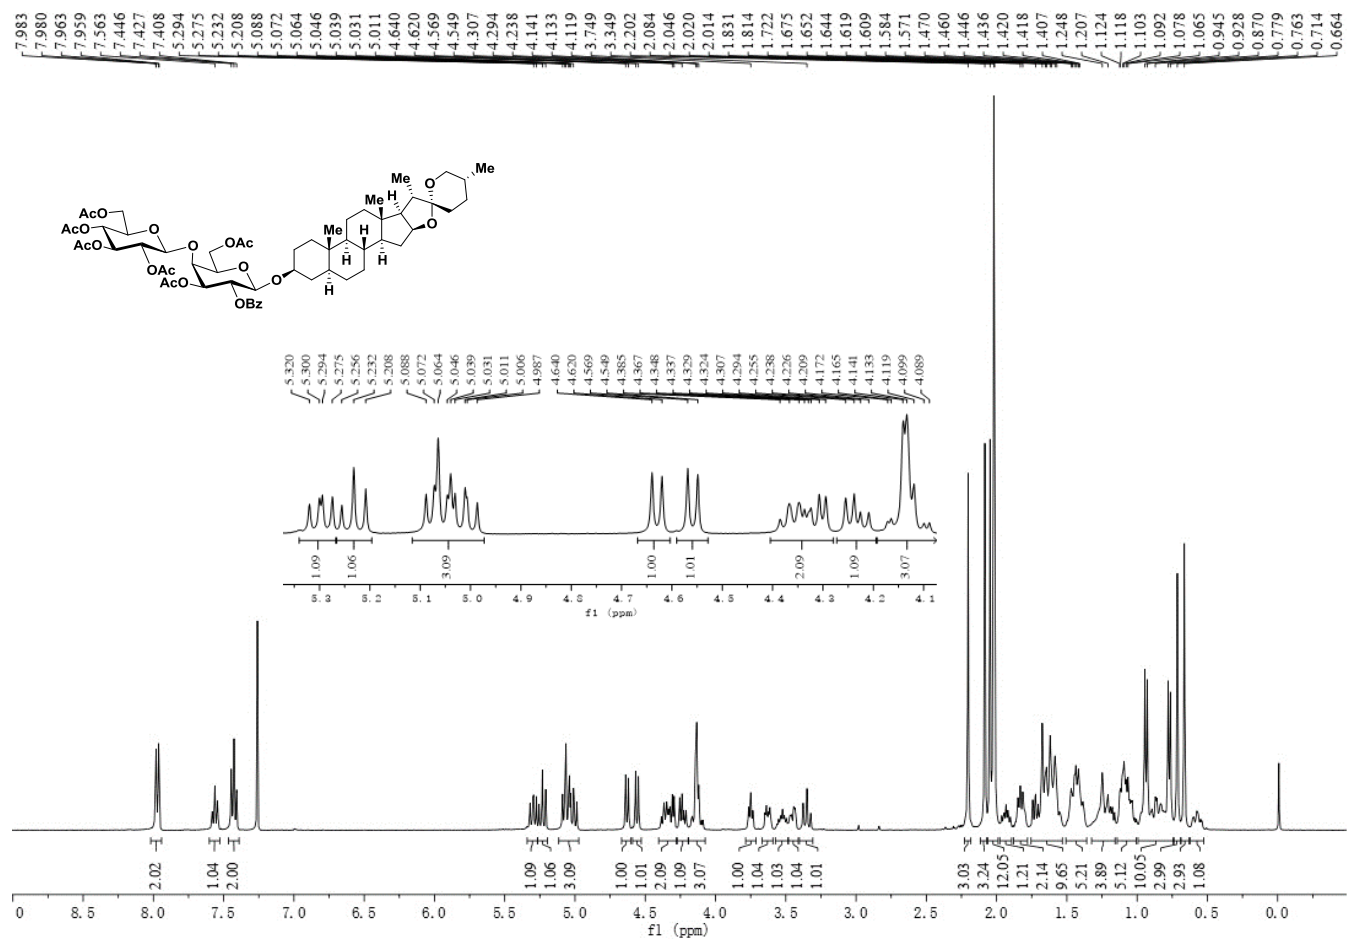

**Figure 46.** <sup>1</sup>H NMR (400 MHz, CDCl<sub>3</sub>) spectrum of compound 33

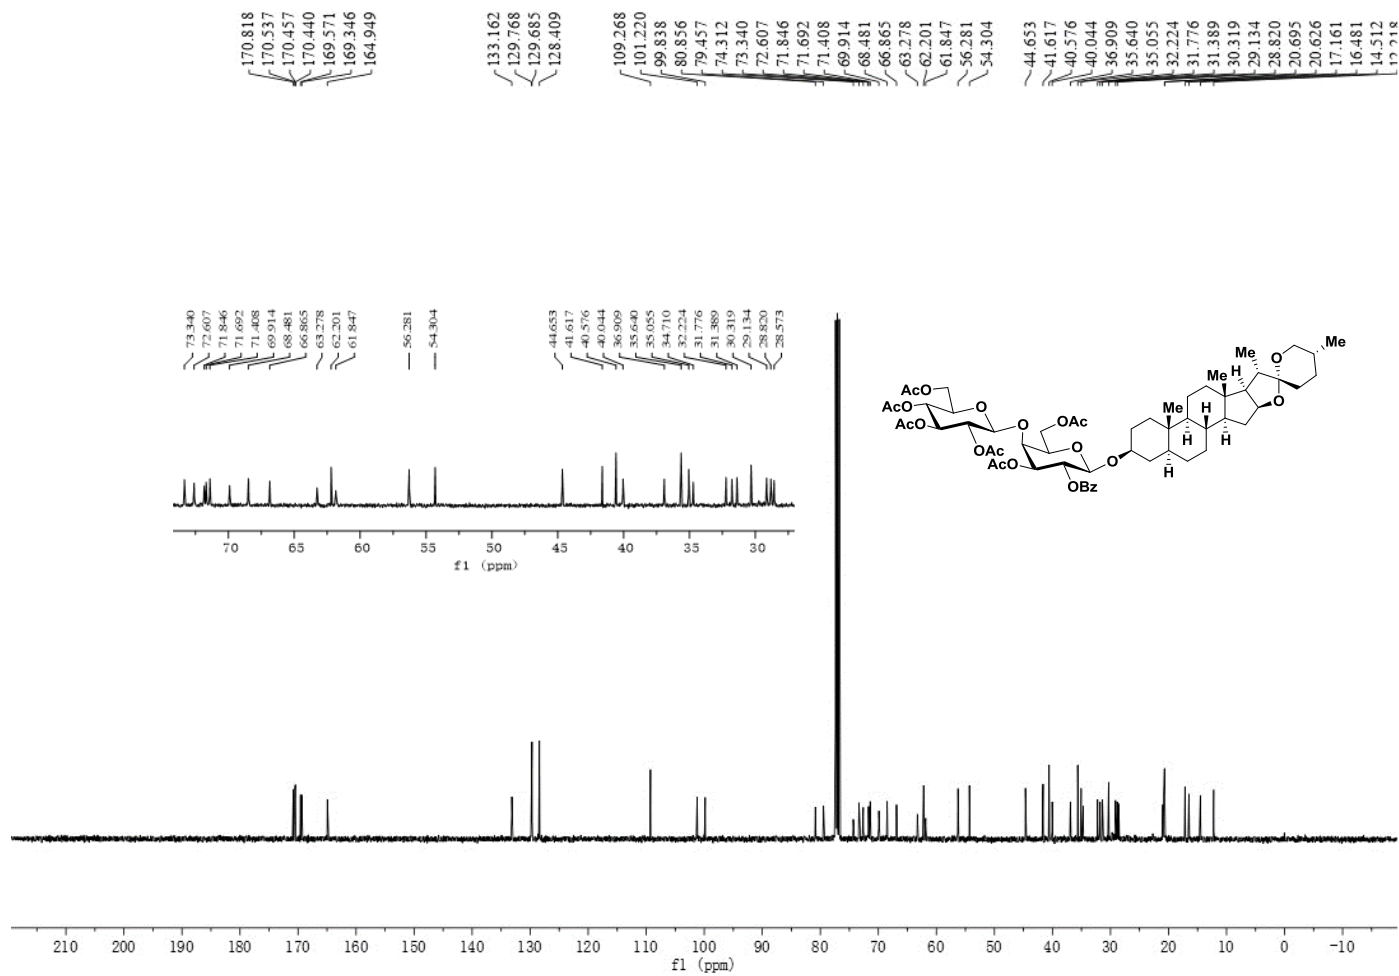

Figure 47.  $^{13}\text{C}$  NMR (100 MHz,  $\text{CDCl}_3$ ) spectrum of compound 33

#### 4. Comparison of selected $^1\text{H}$ NMR and $^{13}\text{C}$ NMR data of natural and synthetic gitonin.

|         | No. | $^1\text{H}$ -Natural <sup>a</sup> | $^1\text{H}$ -Our work <sup>b</sup> | $\Delta\delta = \delta_a - \delta_b$ | $^{13}\text{C}$ -Natural <sup>a</sup> | $^{13}\text{C}$ -Our work <sup>b</sup> | $\Delta\delta = \delta_a - \delta_b$ |
|---------|-----|------------------------------------|-------------------------------------|--------------------------------------|---------------------------------------|----------------------------------------|--------------------------------------|
|         | 18  | 0.79                               | 0.78                                | 0.01                                 | 16.6                                  | 16.6                                   | 0                                    |
|         | 19  | 0.69                               | 0.68                                | 0.01                                 | 13.5                                  | 13.4                                   | 0.1                                  |
|         | 21  | 1.11 (7.0)                         | 1.11 (6.8)                          | 0                                    | 15.0                                  | 15.0                                   | 0                                    |
|         | 27  | 0.70 (6.3)                         | 0.69 (6.4)                          | 0.01                                 | 17.3                                  | 17.3                                   | 0                                    |
| 3-O-Gal | 1   | 4.91 (7.8)                         | 4.92 (8.0)                          | -0.01                                | 103.3                                 | 103.2                                  | 0.1                                  |
|         | 2   |                                    |                                     |                                      | 72.5                                  | 72.4                                   | 0.1                                  |
|         | 3   |                                    |                                     |                                      | 75.8                                  | 75.8                                   | 0                                    |
|         | 4   |                                    |                                     |                                      | 79.4                                  | 79.3                                   | 0.1                                  |
|         | 5   |                                    |                                     |                                      | 75.7                                  | 75.7                                   | 0                                    |
|         | 6   |                                    |                                     |                                      | 60.5                                  | 60.4                                   | 0.1                                  |
| Glc     | 1   | 5.15 (8.0)                         | 5.15 (8.0)                          |                                      | 105.2                                 | 105.3                                  | 0                                    |
|         | 2   |                                    |                                     |                                      | 81.2                                  | 81.1                                   | 0.1                                  |
|         | 3   |                                    |                                     |                                      | 86.1                                  | 85.9                                   | 0.2                                  |
|         | 4   |                                    |                                     |                                      | 70.5                                  | 70.4                                   | 0.1                                  |
|         | 5   |                                    |                                     |                                      | 77.6                                  | 77.6                                   | 0                                    |
|         | 6   |                                    |                                     |                                      | 63.0                                  | 63.0                                   | 0                                    |
| Gal     | 1   | 5.48 (7.8)                         | 5.47 (8.0)                          | 0.01                                 | 105.3                                 | 105.4                                  | -0.1                                 |
|         | 2   |                                    |                                     |                                      | 73.7                                  | 73.7                                   | 0                                    |
|         | 3   |                                    |                                     |                                      | 74.4                                  | 74.3                                   | 0.1                                  |
|         | 4   |                                    |                                     |                                      | 70.5                                  | 70.6                                   | -0.1                                 |
|         | 5   |                                    |                                     |                                      | 77.2                                  | 77.3                                   | -0.1                                 |
|         | 6   |                                    |                                     |                                      | 62.6                                  | 62.7                                   | -0.1                                 |
| Xyl     | 1   | 5.09 (7.6)                         | 5.08 (7.2)                          | 0.01                                 | 104.9                                 | 104.9                                  | 0                                    |
|         | 2   |                                    |                                     |                                      | 75.1                                  | 75.0                                   | 0.1                                  |
|         | 3   |                                    |                                     |                                      | 78.5                                  | 78.5                                   | 0                                    |
|         | 4   |                                    |                                     |                                      | 70.8                                  | 70.7                                   | 0.1                                  |
|         | 5   |                                    |                                     |                                      | 67.3                                  | 67.3                                   | 0                                    |

<sup>a</sup> Only selected  $^1\text{H}$  NMR data was provided in the isolation paper. (*Phytochemistry* **1996**, 42, 1417-1422) Spectra were recorded at 400 MHz ( $^1\text{H}$  NMR) and 100 MHz ( $^{13}\text{C}$  NMR) in Pyridine- $d_5$ .

<sup>b</sup> Spectra were recorded at 400 MHz ( $^1\text{H}$  NMR) and 100 MHz ( $^{13}\text{C}$  NMR) in Pyridine- $d_5$ .
